# Supplementary material for: Polyamine receptors containing anthracene as fluorescent probes for ketoprofen in H2O/EtOH solution
Source: Royal Society of Chemistry journal article supplement (doi:10.1039/d2cc01107g), 2022-01-01
Supplement: d2cc01107g1.pdf [file d2cc01107g1.pdf]

## Polyamine receptors containing anthracene as fluorescent probes for ketoprofen in H<sub>2</sub>O/EtOH solution

Giammarco Maria Romano, Liviana Mummolo, Matteo Savastano, Paola Paoli, Patrizia Rossi, Luca Prodi, Andrea Bencini

### Electronic Supplementary Information (ESI)

#### Synthesis of L1 and L2

Ligands **L1** and **L2** were synthesized as summarized in Scheme S1.

**N1,N3-bis(9-anthrylmethyl)diethylenetriamine (L1).** A solution of 9-anthraldehyde (0.8 g, 3.88 mmol) in EtOH/CH<sub>3</sub>CN 50:50 v/v (50 mL) was added dropwise to a solution of diethylenetriamine (0.2 g, 1.9 mmol) in a mixture solvent of EtOH/CH<sub>3</sub>CN 50:50 v/v (50 mL). The solution was stirred at room temperature for 60 h. the solution was then concentrated by evaporation. The resulting oil was dissolved in EtOH (100 mL) and stirred with NaBH<sub>4</sub> (0.76 g, 20 mmol) at 60 °C for 4 h. the resultant was concentrated by evaporation, dissolved in CHCl<sub>3</sub> (50 mL) and washed with an aqueous NaOH solution (0.1 M, 3 x 30 mL). The organic layer collected was dried with anhydrous Na<sub>2</sub>SO<sub>4</sub> and the solvent was removed under vacuum. The semisolid residue was dissolved in EtOH (50 mL) and precipitated by addition of an aqueous HCl (37%) solution as its HCl salt, which was washed with EtOH and CHCl<sub>3</sub>, and dried under vacuum (0.95 g, yield 73%). Anal. calcd. for C<sub>34</sub>H<sub>36</sub>N<sub>3</sub>Cl<sub>3</sub>·5H<sub>2</sub>O: C 59.78, H 6.79, N 6.15. Found: C 59.38, H 5.32, N 5.69. <sup>1</sup>H NMR (DMSO, 400 MHz): δ(ppm) 8.80 (s, 2H, H<sub>10</sub>), 8.60 (d, 4H, H<sub>1,8</sub>, J<sub>1,2</sub> 9 Hz), 8.18 (d, 4H, H<sub>4,5</sub>, J<sub>3,4</sub> 8 Hz), 7.67 (t, 4H, H<sub>2,7</sub>, J<sub>2,3</sub> 7 Hz), 7.61 (t, 4H, H<sub>3,6</sub>), 5.32 (s, 4H, H<sub>1AL</sub>), 3.81-3.72 (m, 4H, H<sub>2AL</sub>, J<sub>2AL,3AL</sub> 6 Hz), 3.55-3.47 (m, 4H, H<sub>3AL</sub>). <sup>13</sup>C NMR (DMSO, 400 MHz): δ(ppm) 130.83, 130.65, 129.90, 128.98, 127.04, 125.50, 124.55, 122.76, 43.64, 42.81, 42.76. ESI MS (m/z) 484.2752 (z = 1, [**L1** + H]<sup>+</sup>).

**N1,N3-bis(9-anthrylmethyl)dipropylenetriamine (L2).** This product was obtained from 9-anthraldehyde (0.32 g, 1.52 mmol) and dipropylenetriamine (0.1 g, 0.76 mmol) in a mixture solvent of EtOH/CH<sub>3</sub>CN 50:50 v/v (100 mL) by using the same procedure reported for **L1**. (0.32 g, yield 65%). Anal. calcd. for C<sub>36</sub>H<sub>39</sub>N<sub>3</sub>Cl<sub>2</sub>·H<sub>2</sub>O: C 71.75, H 6.86, N 6.97. Found: C 71.09, H 7.28, N 7.36. <sup>1</sup>H NMR (DMSO, 10% D<sub>2</sub>O, 400 MHz): δ(ppm) 8.72 (s, 2H, H<sub>10</sub>), 8.34-8.25 (m, 4H, H<sub>1,8</sub>), 8.17-8.10 (m, 4H, H<sub>4,5</sub>), 7.71-7.63 (m, 4H, H<sub>2,7</sub>), 7.60-7.53 (m, 4H, H<sub>3,6</sub>), 5.17 (s, 4H, H<sub>1AL</sub>), 3.78-3.27 (m, 4H, H<sub>2AL</sub>, J<sub>2AL,3AL</sub> 6 Hz), 3.09-2.97 (m, 4H, H<sub>4AL</sub>, J<sub>3AL,4AL</sub> = 7 Hz), 2.16-2.03 (m, 4H, H<sub>3AL</sub>). <sup>13</sup>C NMR (DMSO, 10% D<sub>2</sub>O, 400 MHz): δ(ppm) 131.84, 131.39, 131.28, 130.31, 128.80, 166.77, 124.27, 122.57, 45.90, 45.21, 43.73, 23.24. ESI MS (m/z) 512.3076 (z = 1, [**L2** + H]<sup>+</sup>); 256.2635 (z = 2, [**L2** + 2H]<sup>2+</sup>).

#### ESI-mass spectrometry

Stock solutions 10<sup>-3</sup> M of the compounds were prepared dissolving the samples in MeOH. The ESI mass study was performed using a TripleTOF® 5600+ high-resolution mass spectrometer (Sciex, Framingham, MA, USA), equipped with a DuoSpray® interface operating with an ESI probe. Respective ESI mass spectra were acquired through direct infusion at 7 μL min<sup>-1</sup> flow rate. For the determination of the **L1**-KP<sub>n</sub> and **L2**-KP<sub>n</sub> (where n = 1 or 2) adducts, 10 μM solution of **L1** and **L2** with two equivalents of ketoprofen in MeOH were prepared. The ESI mass study was performed

using a Waters Xevo G2-XS QToF mass spectrometer. ESI mass spectra were acquired through direct infusion at  $10\ \mu\text{L min}^{-1}$  flow rate.

### Electronic absorption and fluorescence measurements

Absorption and fluorescence spectra were recorded on a Thermo Scientific Evolution 220 spectrophotometer and on a Jasco FP-750 spectrofluorimeter, respectively. An excitation wavelength of 340 nm was used to record fluorescence spectra of ligands. All measurements were performed at  $298.0 \pm 0.1\ \text{K}$ , with ligand concentrations  $1 \times 10^{-5}\ \text{M}$ .

### Potentiometric measurements

Potentiometric (pH-metric) titrations, employed to determine ligand protonation and metal complexation constants, were performed in  $\text{H}_2\text{O}/\text{EtOH}$  50:50 v/v, with  $0.1\ \text{M NMe}_4\text{Cl}$  as ionic strength, at  $298.1 \pm 0.1\ \text{K}$  using an automated apparatus and a procedure previously described.<sup>1</sup> A small addition of DMSO (1 ml every 30 ml of  $\text{H}_2\text{O}/\text{EtOH}$  solution) was required to improve ligand solubility. Acquisition of the emf data was performed with the computer program PASAT.<sup>2,3</sup> The combined Metrohm 6.0262.100 electrode was calibrated as an hydrogen-ion concentration probe by titration of previously standardized amounts of HCl solutions with  $\text{CO}_2$ -free  $\text{NMe}_4\text{OH}$  solutions and determining the equivalent point by Gran's method,<sup>4</sup> which gives the standard potential,  $E^\circ$ , and the ionic product of water (experimental  $\text{pK}_w = 14.58(1)$  in above stated conditions). The computer program HYPERQUAD<sup>5</sup> was used to calculate the protonation constants of the receptors and substrates and the stability constants of the adducts from the potentiometric data. The concentration of ligands was about  $5 \times 10^{-4}\ \text{M}$  in all experiments while the concentrations of ketoprofen were in the range  $0.5 \times 10^{-4}$ – $5 \times 10^{-3}\ \text{M}$ . The studied pH range was 2.5–8.5 for **L1** and 2.5–7.5 for **L2**. Precipitation of fully deprotonated **L1** and **L2** is observed at  $\text{pH} > 9.0$ .

### Description of the protonation features of **L1** and **L2**.

Considering the values of the protonation constants of the receptors (see Table S1), the basicity of diethylenetriamine (dien) steadily drops when benzyl- or naphthyl fragments are appended on its terminal amine groups, e.g., moving from dien to its terminal benzyl ( $\log K_1 = 9.4$ ) and naphthyl ( $\log K_1 = 8.38$ ) terminal bis-derivatives (see reference 20). Data for our anthracenyl derivatives (here **L1** comparison is fully relevant, with the caveat of our study being in a mixed solvent) appear in keeping with these reports. Therefore,  $\log K$  of about 7.8 log units for **L1** is in line with previous data.

What is different with our ligands, in comparison to naphthyl derivatives, is that the anthracene residue decreases terminal amino group basicity to the point where the central amino group becomes the most basic, *i.e.*, the one subject to the first protonation equilibrium, while in naphthyl derivatives protonation of terminal amino groups is observed first. This can be due to higher hydrophobic character of anthracene, which does not favour protonation of an adjacent amine group and consequent formation of a highly hydrated ammonium group. In the naphthyl derivative, entrance of a second proton implies proton migration to the two terminal amino groups and turns on fluorescence. The detection of KP in our case happens on a similar proton transfer basis.

The protonation constants of the bis-naphthyl derivative are  $\log K_1 = 8.38$ ,  $\log K_2 = 7.81$   $\log K_3 = 3.81$ , which are in line with the **L1** values, according for the reduced basicity brought about by the anthracene residue.

The situation appears to be somewhat different for **L2**. **L2** is found less basic than **L1** in the first protonation, happening again on the central amino group. This lowering of basicity is attributed to the increased N-N distance (propylenic spacer) and the impossibility for the lateral amino groups in participating in proton binding (which is attested instead for ethylenediamine, ref. 20).

Second protonation has an almost identical log K with respect to **L1**, as the two lateral amino groups are protonated for both ligands and the repulsion among them in aqueous environment is minimal with both 5 or 7 bonds in-between (see reference 20a of the manuscript).

Lack of third protonation for **L2** or, better, its happening at acidic pH falling outside measurement range, must have a more subtle nature. Successive protonation steps of polyamines tend to be less and less exothermic while, in general, they tend to remain entropically favourable at all stages. The favourable entropic contribution arises from the partial charge-neutralization process tied to H<sup>+</sup> binding, which results in significant desolvation effects (solvent molecules return to the bulk, thus gaining degrees of freedom). Since (i) **L1** is already poorly basic in its third protonation step, (ii) it is inherently less flexible than **L2**, and (iii) **L1** must already be somewhat stiffer than **L2** when both ligands are in diprotonated form (somewhat more electrostatic repulsion), the reduced basicity of **L2** in the third protonation step might arise from its superior flexibility and to the increased loss of conformational degrees of freedom associated with the third protonation step.

## NMR measurements

NMR titrations were carried out by using a Bruker Avance 400 MHz instrument, in D<sub>2</sub>O/CD<sub>3</sub>OD 30:70 (vol/vol) mixture at pH 7, by addition of KP to 0.01 M solutions of **L1** or **L2** or by addition of **L1** or **L2** to a 0.01 M solution of KP. The pH was adjusted at 7 by adding small amounts of NaOD or DCl after each addition of the receptors to solutions of KP or of KP to solutions of **L1** or **L2**.

## Limit of Detection (LOD) determination

The detection limit was determined from the fluorescence titrations data based on a reported method.<sup>6</sup> The fluorescence spectrum of the probes (**L1**, **L2** and [Zn**L2**]<sup>2+</sup>) at pH 7 in H<sub>2</sub>O/EtOH 50:50 (Vol/Vol) was measured by six times and the standard deviation of blank measurement was achieved. To gain the slope, the fluorescence intensity data at 414 nm was plotted as a concentration of KP. So, the detection limit was calculated with the following equation:

$$\text{Detection limit (LOD)} = 3\sigma/S$$

where  $\sigma$  is the standard deviation of blank measurement and S is the slope between the fluorescence versus KP concentration.

## X-ray crystallographic experimental details.

Crystals of compound (H<sub>2</sub>**L2**)<sub>2</sub>·0.75EtOH·2.75H<sub>2</sub>O (**1**) were obtained by slow evaporation of a solution of **L2** and KP (2 equivs.) in H<sub>2</sub>O/EtOH 50:50 (vol/vol) at neutral pH.

Intensity data for compound **1** were collected at 100 K by using a Bruker Apex-II CCD diffractometer. Data were collected with the Bruker APEX2 program<sup>7</sup> and integrated and reduced with the Bruker SAINT software,<sup>8</sup> absorption correction was performed with SADABS-2016/2.<sup>9</sup> Radiation used was Cu-K $\alpha$  ( $\lambda$  = 1.54184 Å).

The crystal structure was solved using the SIR-2004 package<sup>10</sup> and refined by full-matrix least squares against  $F^2$  using all data (SHELXL-2018/3).<sup>11</sup> All non-hydrogen atoms, except for those of the solvent molecules, were refined with anisotropic displacement parameters. The hydrogen

atoms bonded to the nitrogen atoms of the **L2** ligand were found in the Fourier difference map and their coordinated were freely refined while their thermal parameters were set in accordance to the one of the atoms to which they are bonded. All the other hydrogen atoms of the ligand and of the ketoprofen anions were set in calculated position. The ethanol molecules and all the 2.75 water molecules present in the asymmetric unit were in disordered position. Such disorder was modelled using for the ethanol molecule two position (occupancy factors were set to 0.5 and 0.25 for the two models), and for the water molecules using three possible positions with occupancy factors ranging from 0.25 and 0.5. Solvent molecules hydrogen atoms were not introduced in the refinement. Geometrical calculations were performed by PARST97<sup>12</sup> and molecular plots were produced by the program Mercury (v4.3.1)<sup>13</sup> and Discovery Studio Visualizer 2019.<sup>14</sup> Crystallographic data and refinement parameters are reported in Table S3.

### Details of the crystal structure of the (H<sub>2</sub>L<sub>2</sub>)<sub>2</sub>·0.75EtOH·2.75H<sub>2</sub>O (**1**)

In the asymmetric unit of **1** (Figure 3), one H<sub>2</sub>L<sub>2</sub><sup>2+</sup> cation, two KP anions, 0.75 ethanol molecules and 2.75 water molecules are present. All the solvent molecules are in disordered position.

The H<sub>2</sub>L<sub>2</sub><sup>2+</sup> cation takes an open arrangement with the chain connecting the two anthracene moieties showing an all-trans conformation (see Table S4, Figure 3) and the two anthracene rings forming each other an angle of about 60 degrees.

Concerning the KP anions, in Table S4 the dihedral angles  $\tau_1$ ,  $\tau_2$ ,  $\tau_3$  (see Scheme S2) and the angle between the two aromatic rings for the six structures are reported. On the basis of these torsion angles, the conformation of the two KP anions can be described as (+ac)(+ac)(sp) and (+ac)(sp)(-sc) for the S and R enantiomer, respectively. These conformations were compared with those of seven compounds<sup>15-19</sup> containing ketoprofen retrieved in the Cambridge Structural Database (CSD, v 5.41)<sup>20</sup>; interestingly none of them show a value for  $\tau_2$  comparable with that observed in the S enantiomer (see Figure 3 and Tables S4 and S5).

Concerning the crystal packing of compound **1**, in Table S6 the H-bonds involving H<sub>2</sub>L<sub>2</sub><sup>2+</sup> cations and ketoprofen anions are reported. Each H<sub>2</sub>L<sub>2</sub><sup>2+</sup> cation is connected, due to the two protonated nitrogen atoms, to four different ketoprofen anion, 2 R and 2 S. In addition, the unprotonated nitrogen atom, N1, interact with the carbonyl oxygen atom of one ketoprofen anion (see Figure S18).

Carboxylic oxygen atom O1B connects two H<sub>2</sub>L<sub>2</sub><sup>2+</sup> cations, the same cations are linked by the C10A(O1AO2A) carboxylic group, as a consequence a [(H<sub>2</sub>L<sub>2</sub>)<sub>2</sub>/4KP] unit is formed (see Figure S18). A global perspective of crystal packing features is presented in Figure S19.

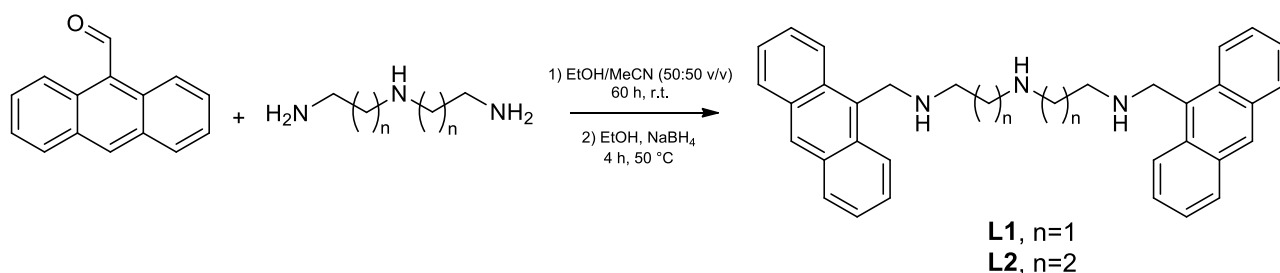

**Scheme S1.** Synthetic route to obtain ligands **L1** and **L2**

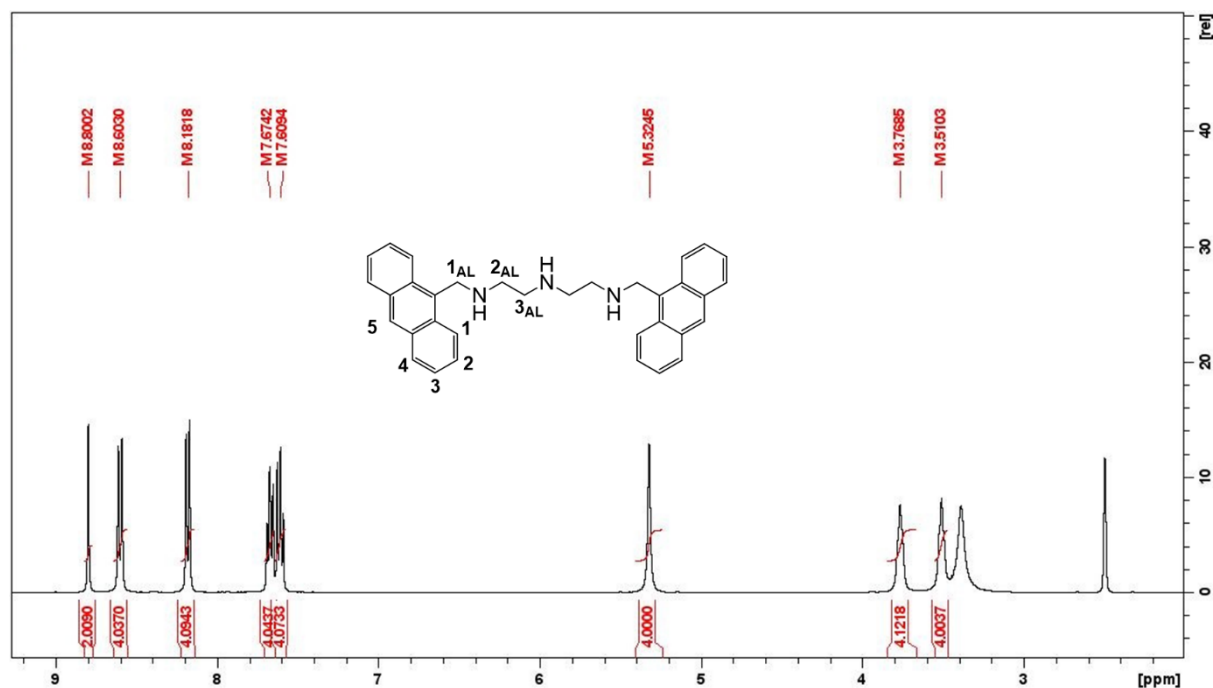

**Figure S1.**  $^1\text{H}$  NMR spectrum of compound **L1** (DMSO, 400 MHz, 298 K):  $\delta(\text{ppm})$  8.80 (s, 2H, H5), 8.60 (d,  $J_{1,2}=9$  Hz, 4H, H1), 8.18 (d,  $J_{3,4}=8$  Hz, 4H, H4), 7.67 (t,  $J_{2,3}=7$  Hz, 4H, H2), 7.61 (t, 4H, H3), 5.32 (s, 4H, H1<sub>AL</sub>), 3.81-3.72 (m, 4H, H2<sub>AL</sub>), 3.55-3.47 (m, 4H, H3<sub>AL</sub>). The aliphatic signals are affected by line broadening, preventing the estimation of the proton coupling constants.

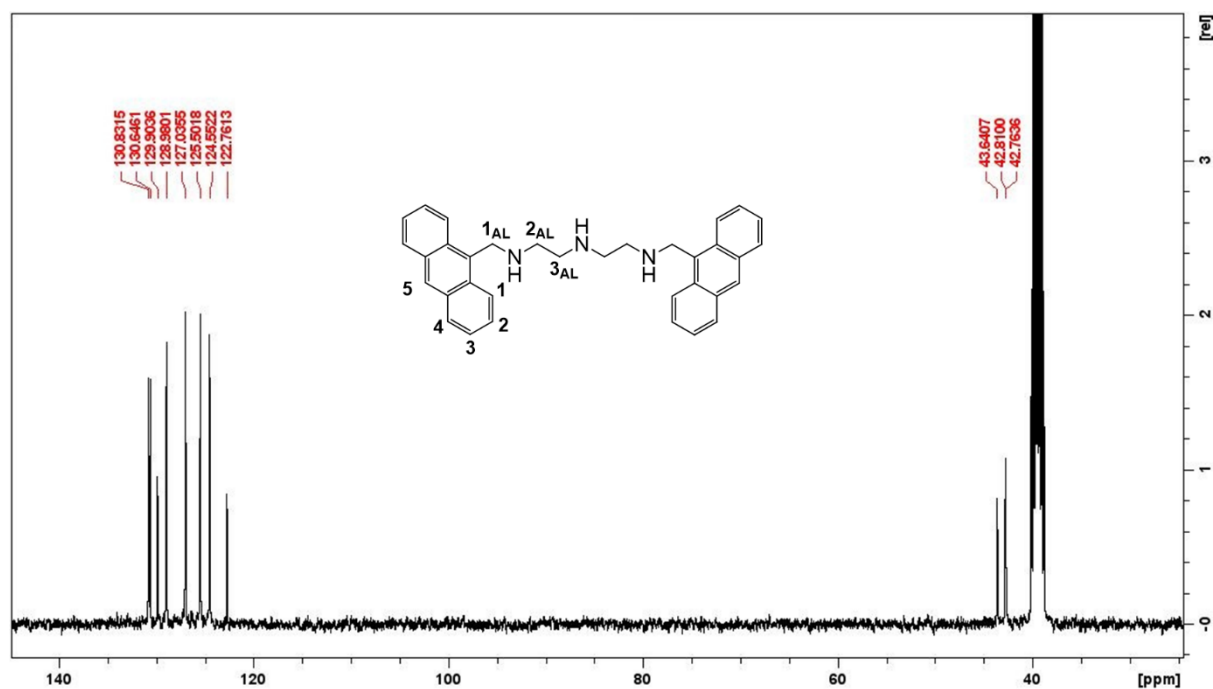

**Figure S2.**  $^{13}\text{C}$  NMR spectrum of compound **L1** (DMSO, 100 MHz, 298 K):  $\delta(\text{ppm})$  130.83, 130.65, 129.90, 128.98, 127.04, 125.50, 124.55, 122.76, 43.64, 42.81, 42.76.

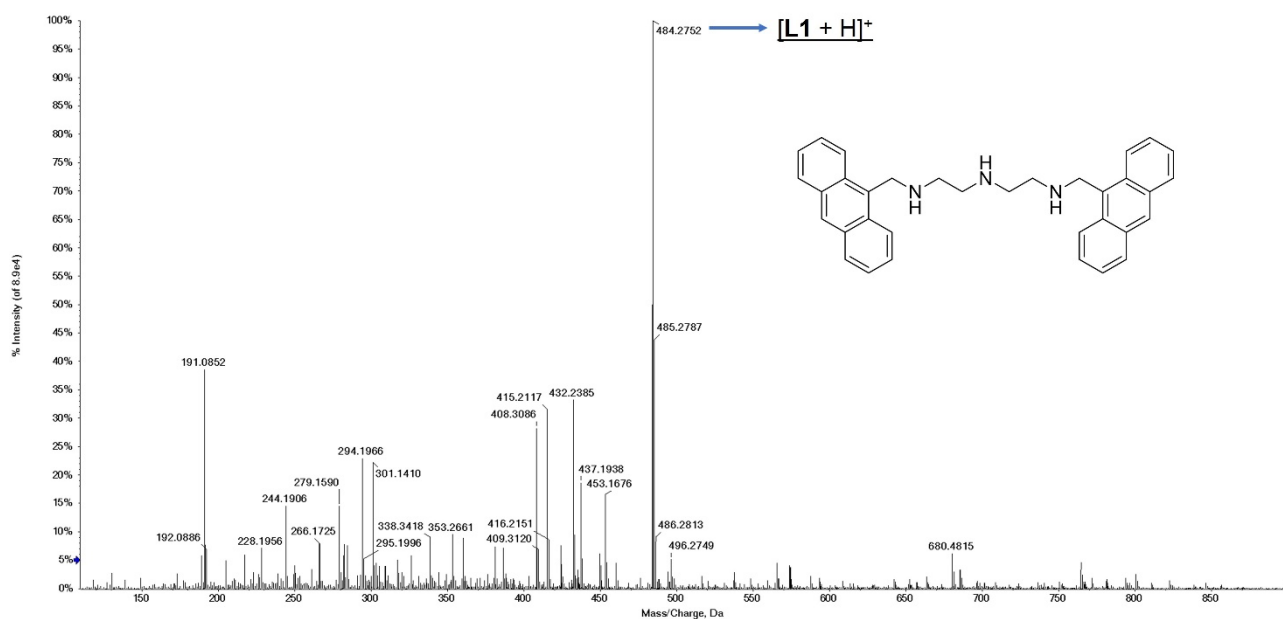

**Figure S3.** High resolution mass spectrum of compound **L1** in MeOH; 484.2752 ( $z = 1$ ,  $[L1 + H]^+$ ).

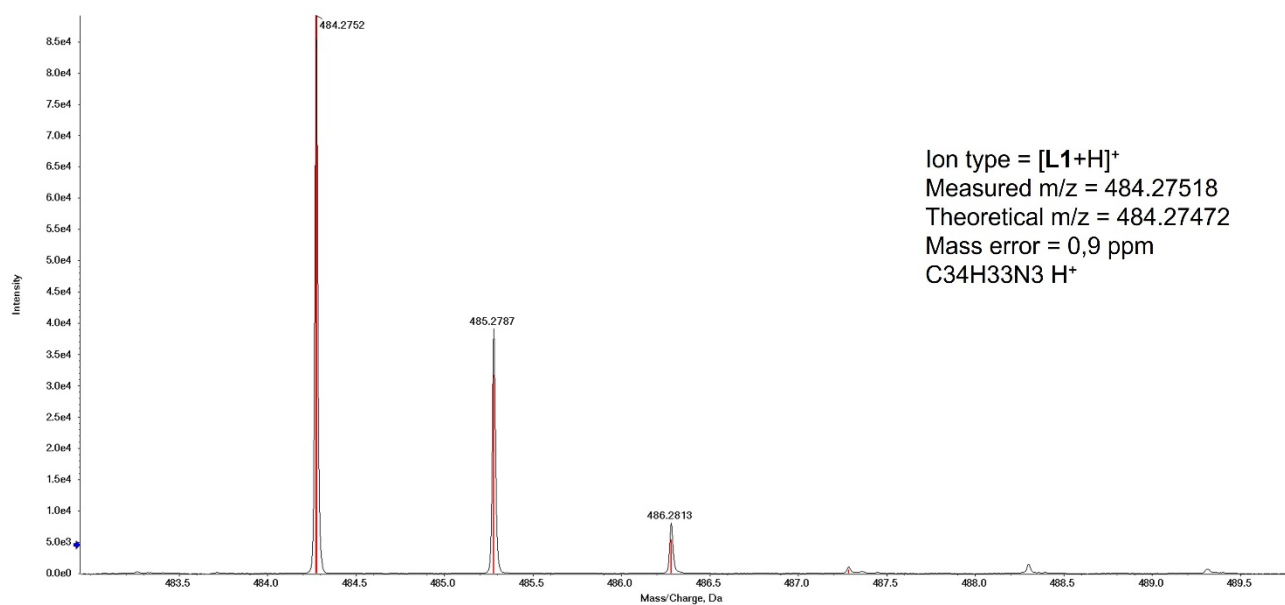

**Figure S4.** Isotopic pattern of the  $[L1+H]^+$  ( $z = 1$ ) ion, with measured (black) and theoretical (red)  $m/z$  value of the most abundant isotopic peak, 283.0-490.0 Da region.

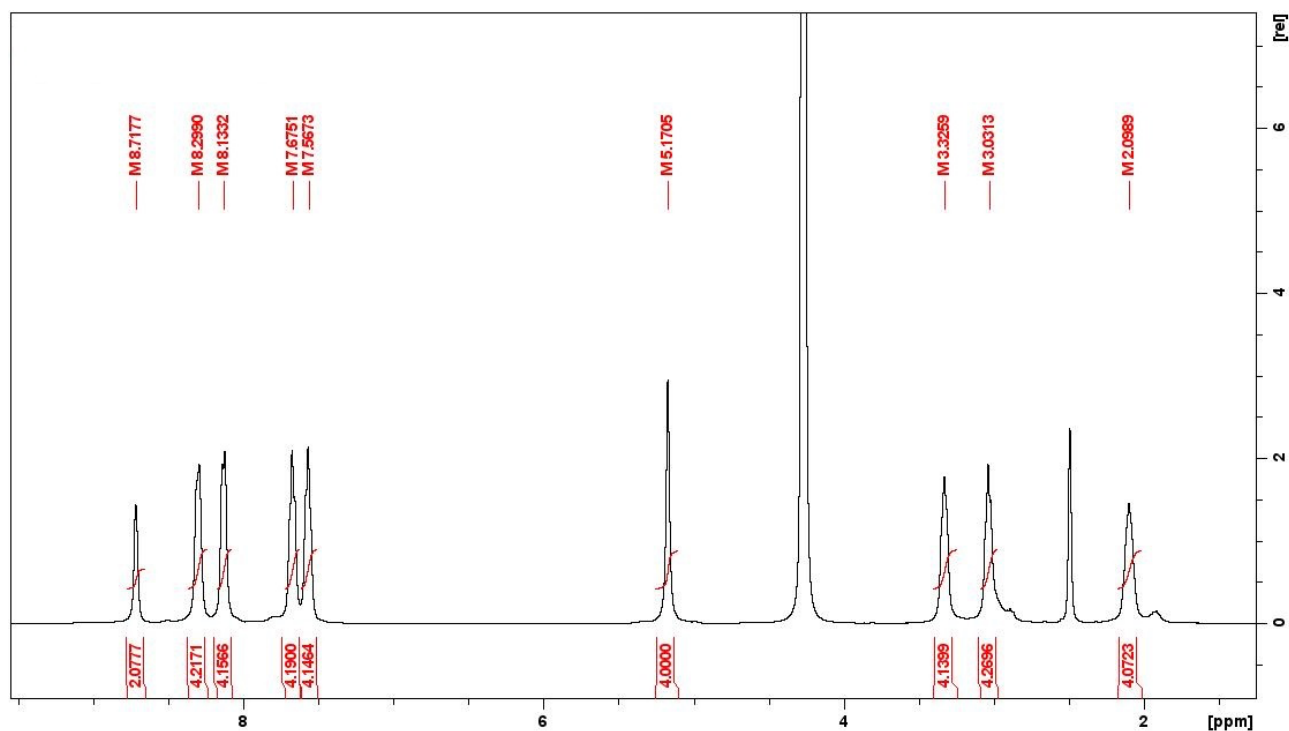

**Figure S5.**  $^1\text{H}$  NMR spectrum of compound **L2** (DMSO, 10%  $\text{D}_2\text{O}$ , 400 MHz, 298 K):  $\delta(\text{ppm})$  8.72 (s, 2H, H5), 8.34-8.25 (m, 4H, H1), 8.17-8.10 (m, 4H, H4), 7.71-7.63 (m, 4H, H2), 7.60-7.53 (m, 4H, H3), 5.17 (s, 4H, H1<sub>AL</sub>), 3.78-3.27 (m, 4H, H2<sub>AL</sub>), 3.09-2.97 (m, 4H, H4<sub>AL</sub>), 2.16-2.03 (m, 4H, H3<sub>AL</sub>). The spectrum is affected by line broadening, preventing the estimation of the proton coupling constants.

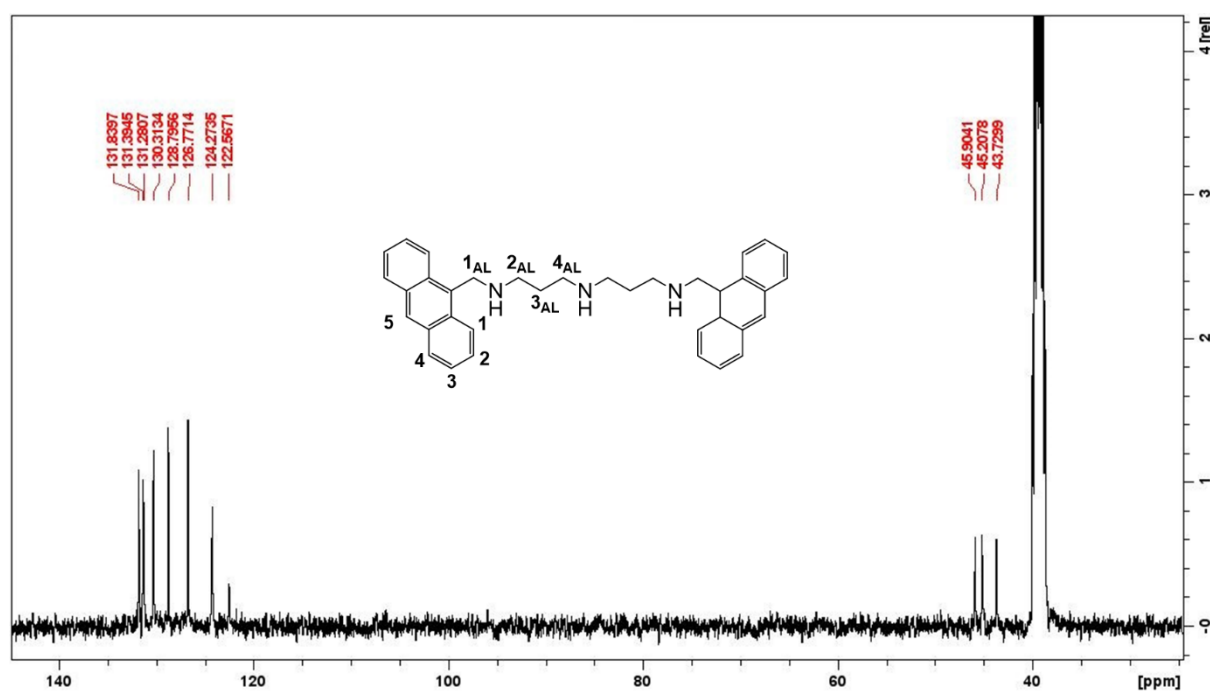

**Figure S6.**  $^{13}\text{C}$  NMR spectrum of compound **L2** (DMSO, 10%  $\text{D}_2\text{O}$ , 100 MHz, 298 K):  $\delta(\text{ppm})$  131.84, 131.39, 131.28, 130.31, 128.80, 166.77, 124.27, 122.57, 45.90, 45.21, 43.73, 23.24.

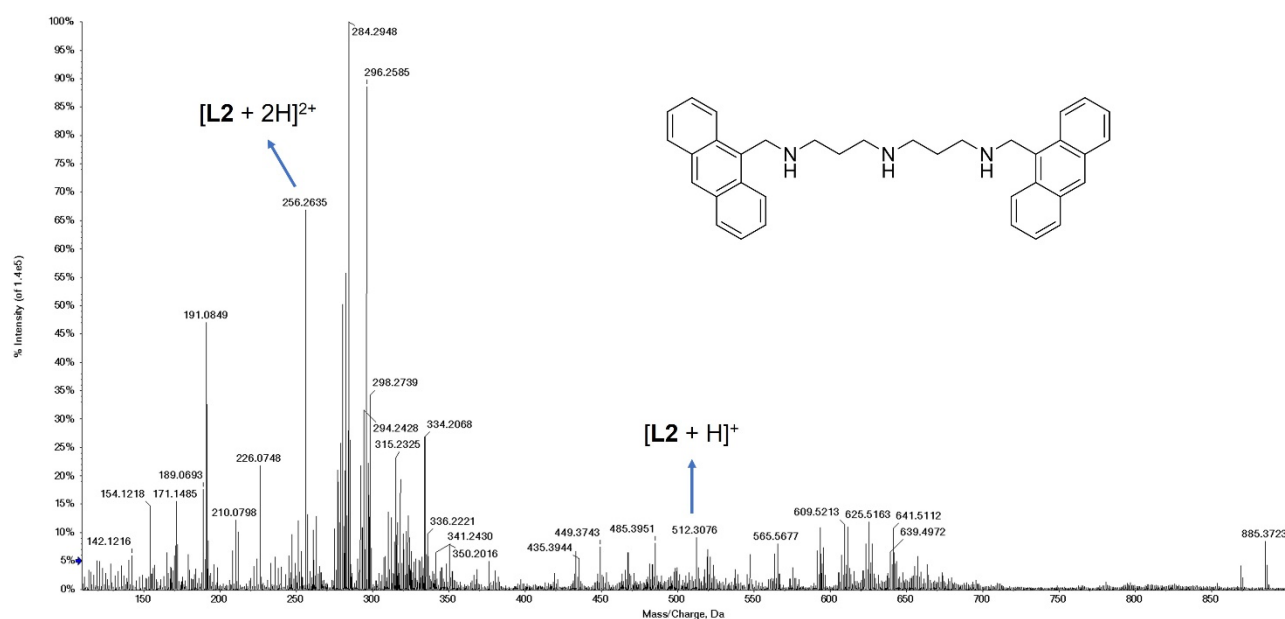

**Figure S7.** High resolution mass spectrum of compound **L2** in MeOH (0.1% FoA); 512.3076 ( $z = 1$ ,  $[\mathbf{L2} + \mathbf{H}]^+$ ); 256.2635 ( $z = 2$ ,  $[\mathbf{L2} + 2\mathbf{H}]^{2+}$ ).

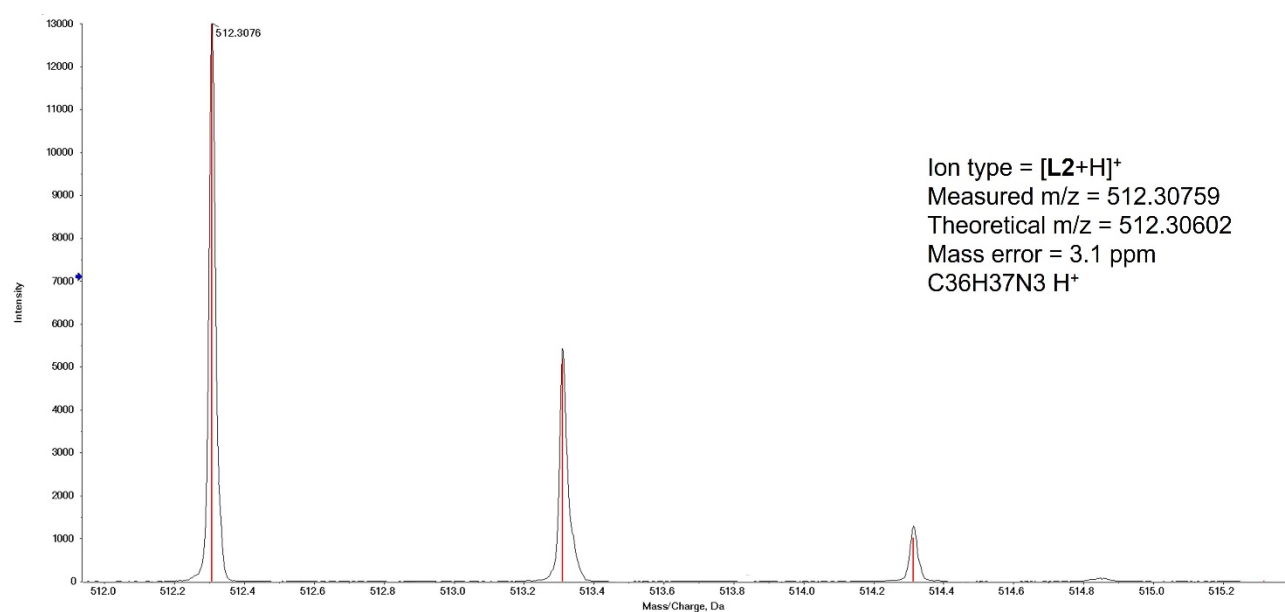

**Figure S8.** Isotopic pattern of the  $[\mathbf{L2} + \mathbf{H}]^+$  ( $z = 1$ ) ion, with measured (black) and theoretical (red)  $m/z$  value of the most abundant isotopic peak, 512.1-515.4 Da region.



| Equilibrium                   | L1      | L2      |
|-------------------------------|---------|---------|
| $L + H^+ = HL^+$              | 7.78(5) | 6.76(8) |
| $HL^+ + H^+ = H_2L^{2+}$      | 5.80(4) | 5.84(7) |
| $H_2L^{2+} + H^+ = H_3L^{3+}$ | 3.31(7) | -       |

**Table S1.** Protonation constants of L1 and L2 at 298.1±0.1 K, 0.1 M NMe<sub>4</sub>Cl H<sub>2</sub>O/EtOH 50:50 v/v).

|       | Ketoprofen | Acetate | Benzoate | Ibuprofen |
|-------|------------|---------|----------|-----------|
| log K | 5.31(1)    | 5.41(4) | 5.23(2)  | 5.31(3)   |

**Table S2.** Protonation constants of ketoprofen, acetate, benzoate and ibuprofen (298.1±0.1 K, 0.1 M NMe<sub>4</sub>Cl H<sub>2</sub>O/EtOH 50:50 v/v).

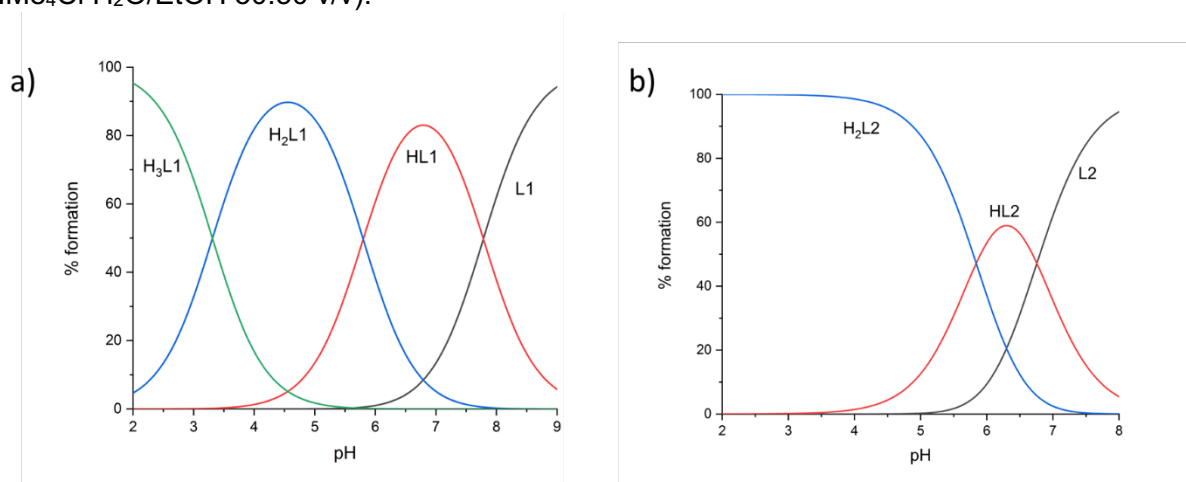

**Figure S9.** Distribution diagrams of the protonated species of **L1** (a) and **L2** (b) ([L1] = [L2] = 5×10<sup>-4</sup> M), calculated on the basis of the equilibrium constants in Table 1 (298.1±0.1 K, 0.1 M NMe<sub>4</sub>Cl H<sub>2</sub>O/EtOH 50:50 v/v).

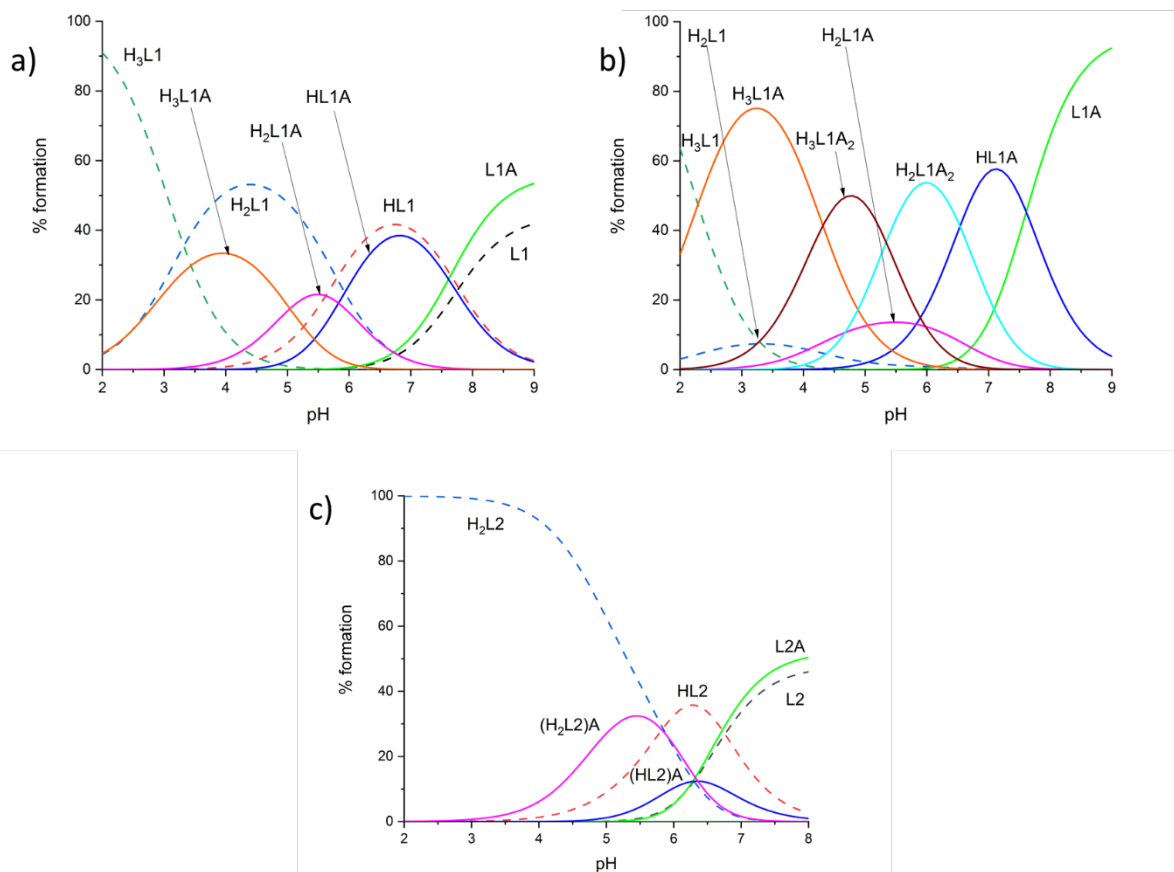

**Figure S10.** Distribution diagrams of the 1:1 **L1**-ketoprofen (the anionic form of ketoprofen is indicated with A) complexes (a,  $[L1] = [A] = 5 \times 10^{-4}$  M), 1:2 L1-A complexes (b,  $[L1] = 5 \times 10^{-4}$  M,  $[A] = 5 \times 10^{-3}$  M) and 1:1 **L2**-ketoprofen complexes (b,  $[L2] = 5 \times 10^{-4}$  M,  $[A] = 1.5 \times 10^{-3}$  M) calculated on the basis of the equilibrium constants in Table 1. Dashed lines refer to uncomplexed ligand species ((298.1 $\pm$ 0.1 K, 0.1 M  $NMe_4Cl$   $H_2O/EtOH$  50:50 v/v).

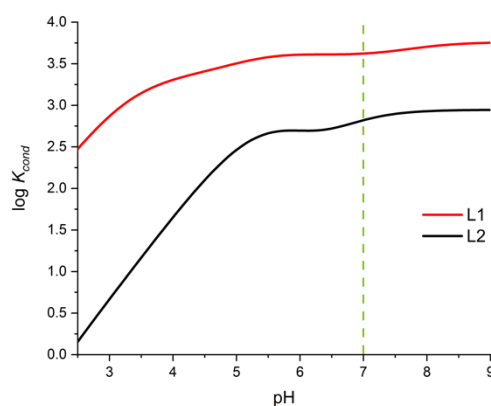

**Figure S11.** pH dependence of the conditional constants for **L1** and **L2**.  $K_{cond} = \frac{\Sigma[H_i + jLA]}{(\Sigma[HiL] \times \Sigma[H_jA])}$ , with  $L=L1$  or  $L2$ ,  $i$  and  $j$  number of acidic protons on the ligand and on the anion, respectively (298.1 $\pm$ 0.1 K, 0.1 M  $NMe_4Cl$   $H_2O/EtOH$  50:50 v/v).

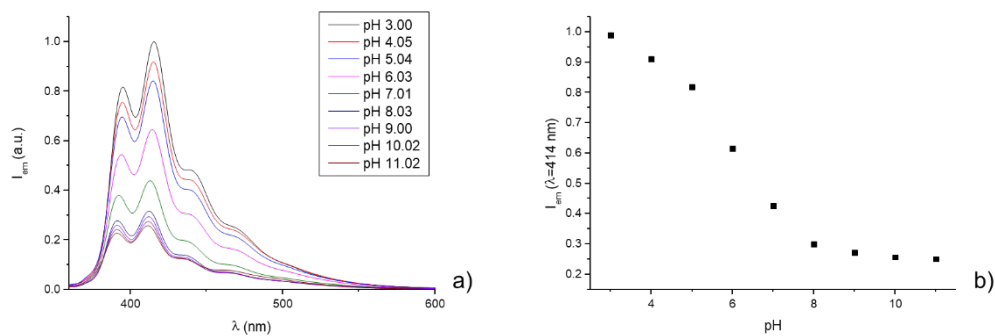

**Figure S12.** (a) Fluorescence spectra of **L1** at different pH values in H<sub>2</sub>O/EtOH 50:50 (Vol/Vol) and (b) plot of the fluorescence emission at 414 nm as function of pH (**[L1]** =  $10^{-5}$  M,  $\lambda_{exc}$  = 340 nm, 298 K).

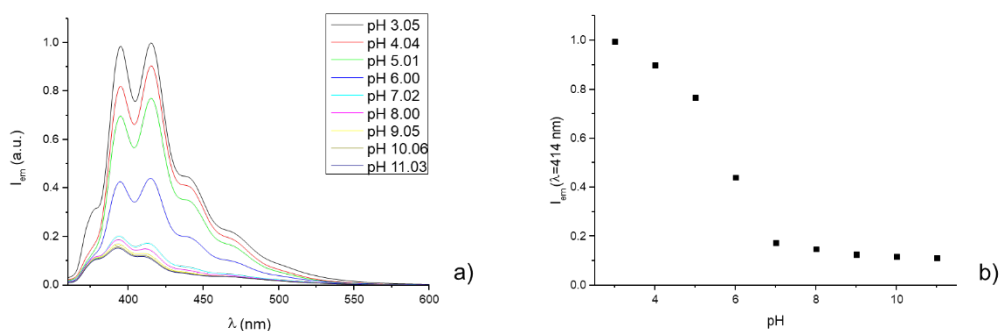

**Figure S13.** (a) Fluorescence spectra of **L2** at different pH values in H<sub>2</sub>O/EtOH 50:50 (Vol/Vol) and (b) plot of the fluorescence emission at 414 nm as function of pH (**[L2]** =  $10^{-5}$  M,  $\lambda_{exc}$  = 340 nm, 298 K).

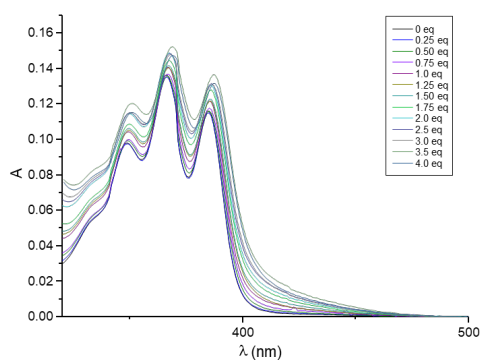

**Figure S14.** Absorption spectra of **L1** at pH 7 (0.001 M TRIS buffer) in H<sub>2</sub>O/EtOH 50:50 (Vol/Vol) in the presence of increasing amounts of ketoprofen (**[L1]** =  $10^{-5}$  M, 298 K).

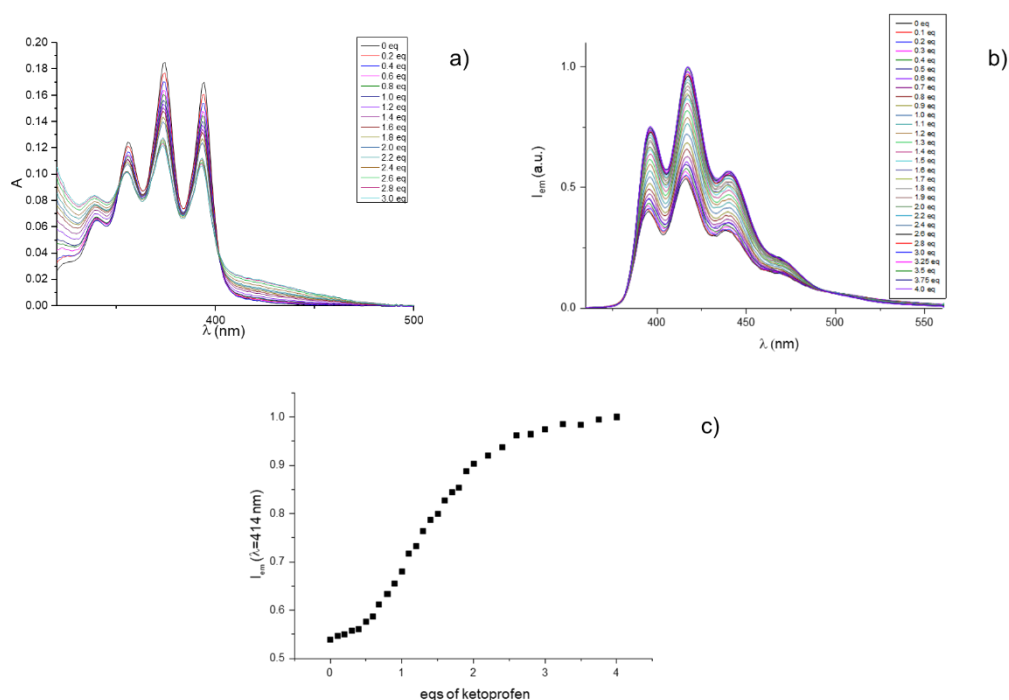

**Figure S15.** (a) Absorption and (b) emission spectra of **L2** at pH 7 (0.001 M TRIS buffer) in H<sub>2</sub>O/EtOH 50:50 (Vol/Vol) in the presence of increasing amounts of ketoprofen ( $[\mathbf{L2}] = 10^{-5}$  M,  $\lambda_{exc} = 340$  nm, 298 K). (c) Plot of the fluorescence emission of **L2** at 414 nm.

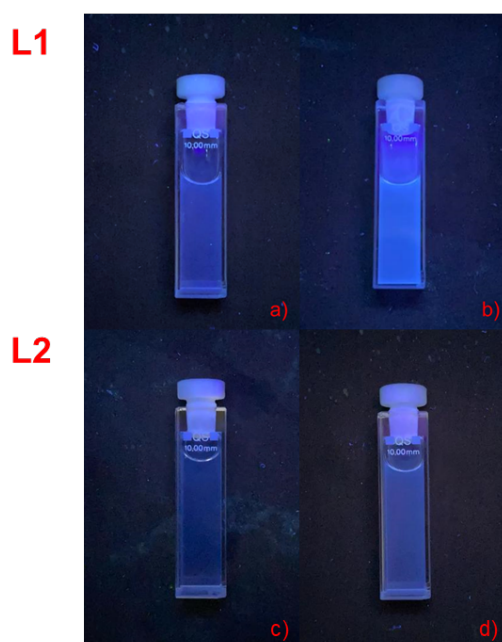

**Figure S16.** Images of **L1** (a and b) and **L2** (c and d) at pH 7 (0.001 M TRIS buffer) in H<sub>2</sub>O/EtOH 50:50 (Vol/Vol), under UV lamp ( $\lambda_{exc} = 366$  nm, 298 K) before (a and c) and after (b and d) the addition of 10 equivalents of ketoprofen. ( $[\mathbf{L1}] = [\mathbf{L2}] = 10^{-5}$  M).

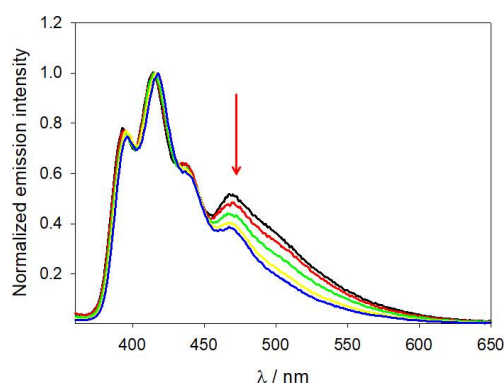

**Figure S17.** Fluorescence emission spectra of **L1** at pH 7 (0.001 M TRIS buffer) in H<sub>2</sub>O/EtOH 50:50 (Vol:Vol) normalized on the maxima in presence of 0 (black), 1 (red), 2 (green), 3 (yellow) and 4 (blue) equivalents of ketoprofen ( $[L1] = 10^{-5}$  M,  $\lambda_{exc} = 340$  nm, 298 K).

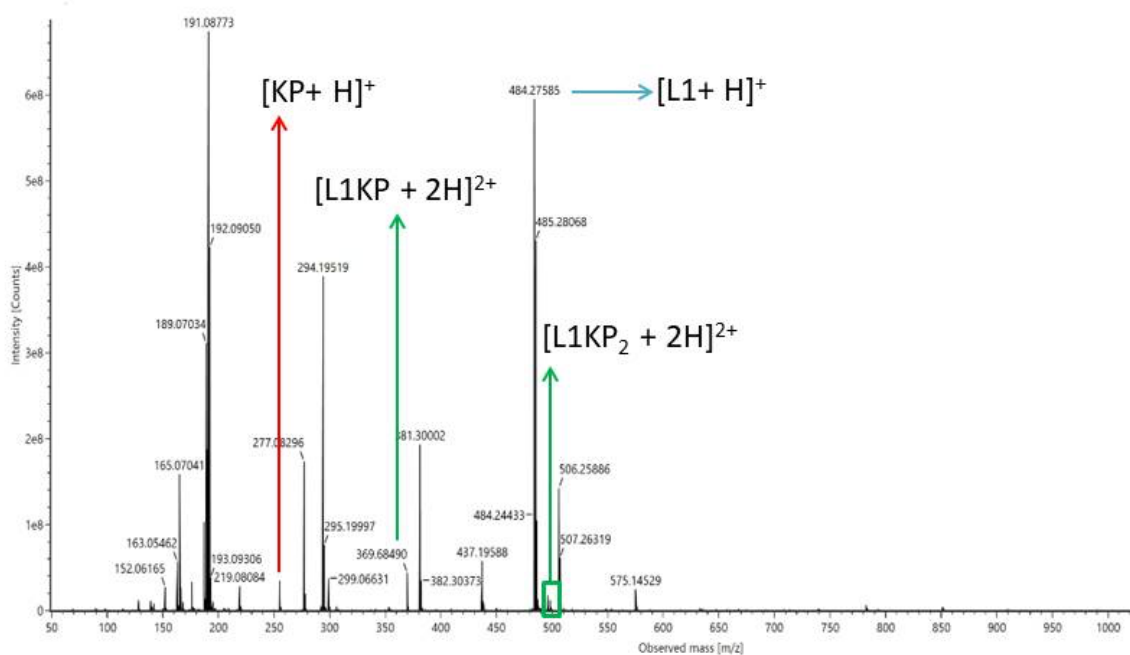

**Figure S18.** High resolution mass spectrum of in the presence of **KP (2 equivs.)** in MeOH: 255.1012 ( $z = 1$ ,  $[KP + H]^+$ ), 369.6849 ( $z = 2$ ,  $[L1(KP) + 2H]^{2+}$ ), 484.2752 ( $z = 1$ ,  $[L1 + H]^+$ ), 496.73547 ( $z = 2$ ,  $[L1(KP)_2 + 2H]^{2+}$ ).

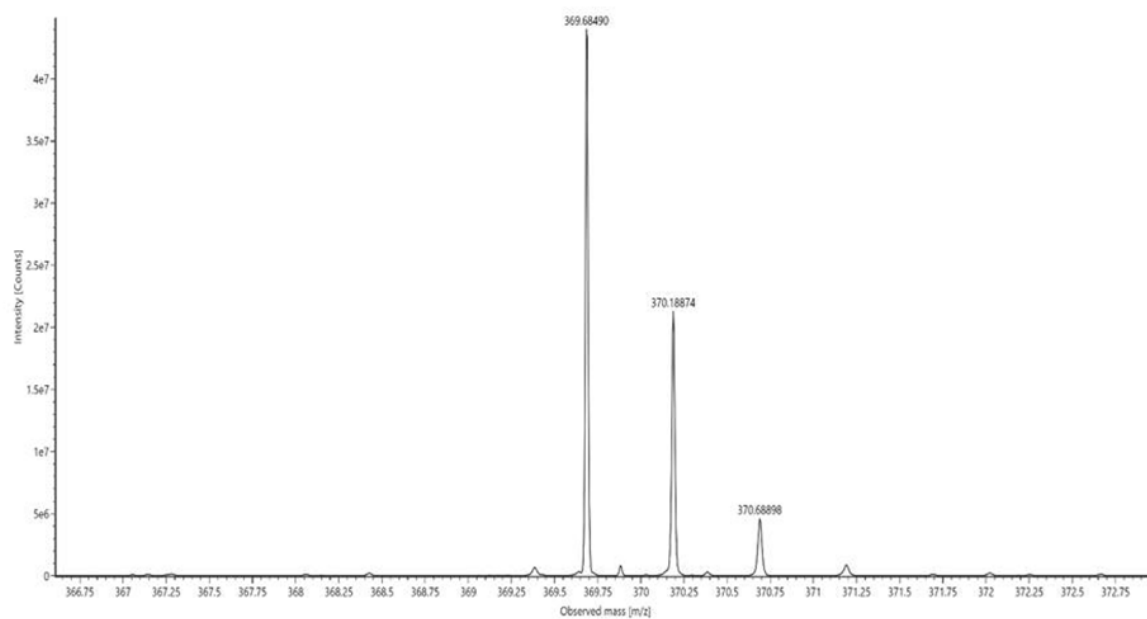

**Figure S19.** Isotopic pattern of the 1:1 adduct  $[\text{L1}(\text{KP})_2 + 2\text{H}]^{2+}$  ( $z = 2$ ) ion, with measured  $m/z$  values.

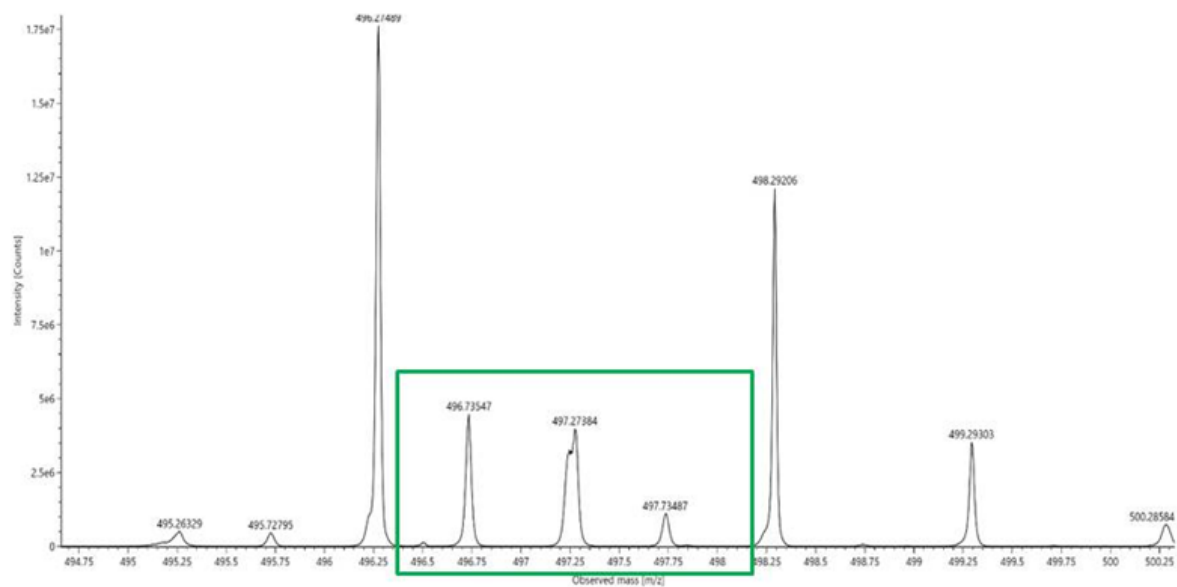

**Figure S20.** Isotopic pattern of the 1:2 adduct  $[\text{L1}(\text{KP})_2 + 2\text{H}]^{2+}$  ( $z = 2$ ) ion, with measured  $m/z$  values.

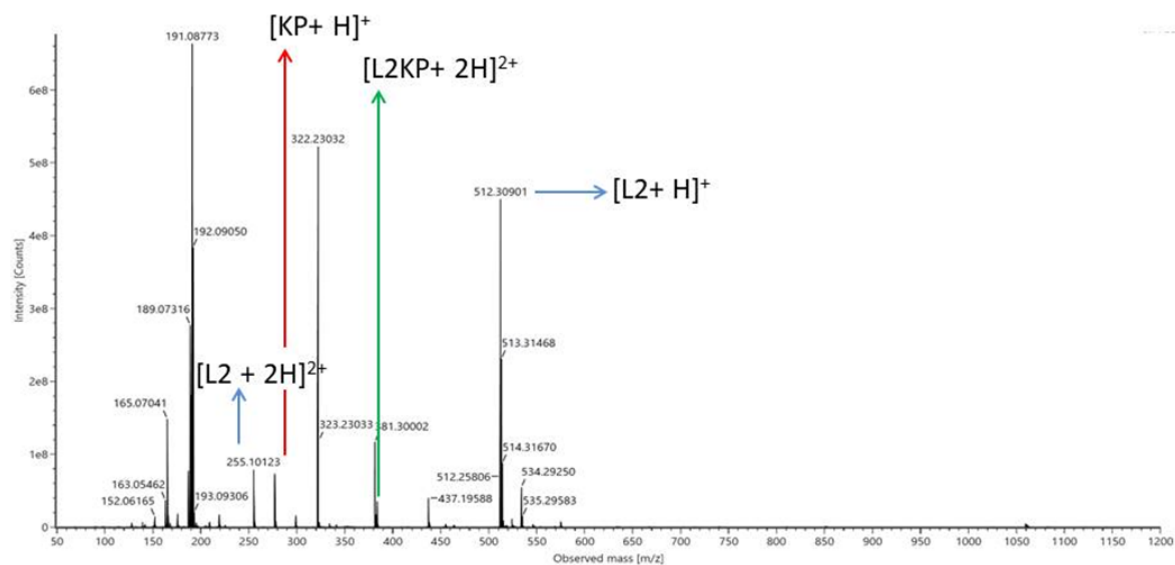

**Figure S21.** High resolution mass spectrum of **L2** in the presence of KP (2 equivs.) in MeOH: 255.1012 ( $z = 1$ ,  $[KP + H]^+$ ), 256.2635 ( $z = 2$ ,  $[L2 + 2H]^{2+}$ ), 383.7015 ( $z = 2$ ,  $[L2(KP) + 2H]^{2+}$ ), 510.74916 ( $z = 2$ ,  $[L2(KP)_2 + 2H]^{2+}$ ), 512.3090 ( $z = 1$ ,  $[L2 + H]^+$ ).

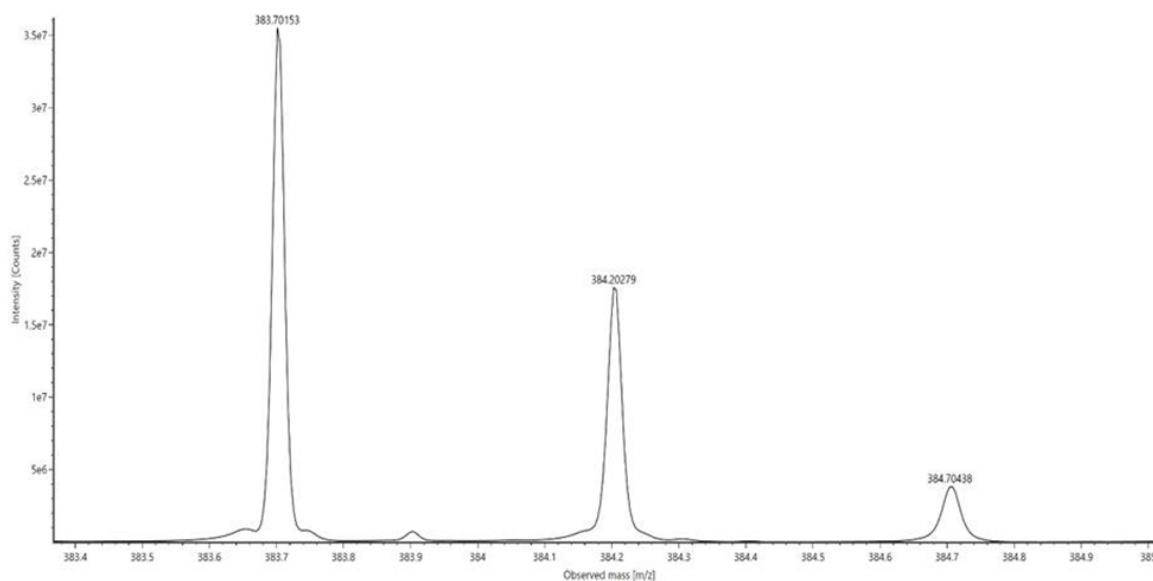

**Figure S22.** Isotopic pattern of the 1:1 adduct  $[L2(KP) + 2H]^{2+}$ , ( $z = 2$ ) ion, with measured m/z values.

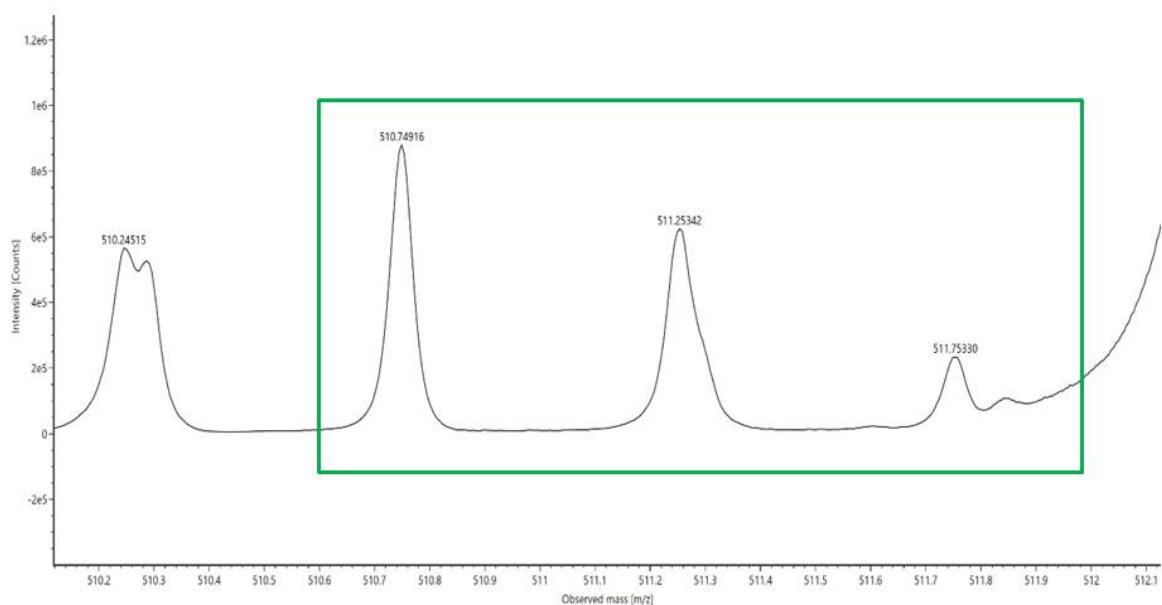

**Figure S23.** Isotopic pattern of the 1:2 adduct  $[L2(KP)_2 + 2H]^{2+}$ , ( $z = 2$ ) ion, with measured  $m/z$  values.

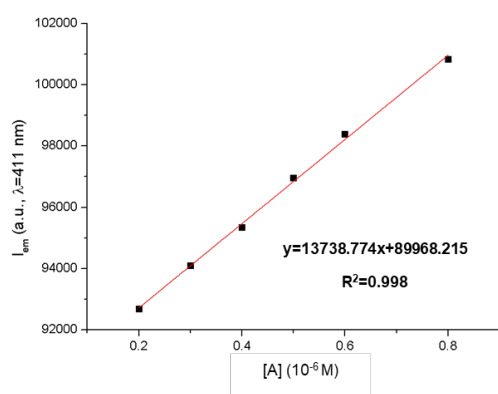

(a)

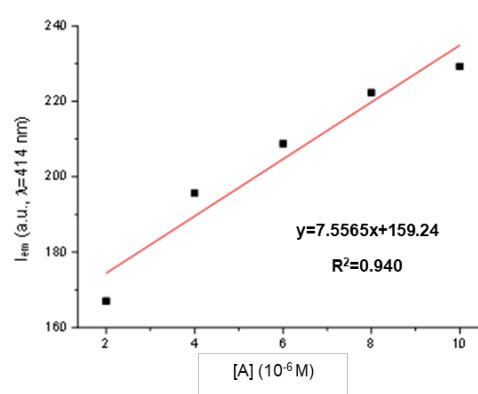

(b)

**Figure S24.** Plot of fluorescence emission of **L1** ( $[L1] = 10^{-5}$  M,  $\lambda_{exc} = 340$  nm,  $\sigma = 981.375$ ) (a) and **L2** ( $[L2] = 10^{-5}$  M,  $\lambda_{exc} = 340$  nm,  $\sigma = 0.712$ ) (b) at pH 7 (0.001 M TRIS buffer) in  $H_2O/EtOH$  50:50 (Vol/Vol) in the presence of increasing amount of ketoprofen at 298 K. The detection limit was calculated to be 0.21  $\mu M$  for **L1** and 0.24  $\mu M$  for **L2**.



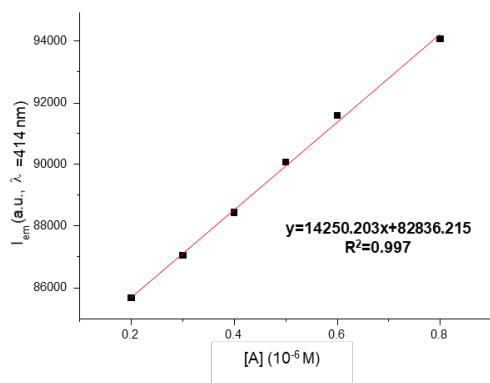

(a)

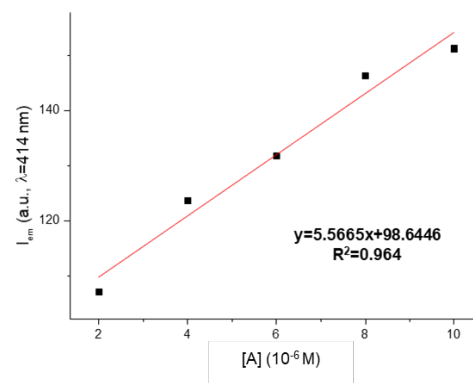

(b)

**Figure S25.** Plot of fluorescence emission of **L1** ( $[L1] = 10^{-5}$  M,  $\lambda_{exc} = 340$  nm,  $\sigma = 1679.534$ ) and **L2** ( $[L2] = 10^{-5}$  M,  $\lambda_{exc} = 340$  nm,  $\sigma = 0.7473$ ) at pH 7 in tap water/EtOH 50:50 (Vol/Vol) in the presence of increasing amount of ketoprofen at 298 K. The detection limit was calculated to be 0.35  $\mu$ M for **L1** and 0.40  $\mu$ M for **L2**. Tap water characteristics:  $NH_4^+$ , 0.05 mg/L; total As, 1  $\mu$ g/L;  $Ca^{2+}$ , 55 mg/L; free Cl residue 0.29 mg/L;  $Cl^-$  48 mg/L;  $Mg^{2+}$ , 12 mg/L; total Mn 2 mg/L;  $NO_3^-$  5 mg/L;  $K^+$  4 mg/L;  $Na^+$  32 mg/L;  $SO_4^{2-}$  53 mg/L; hardness, 18 °f; fixed residue 365 mg/L; pH 7.2.

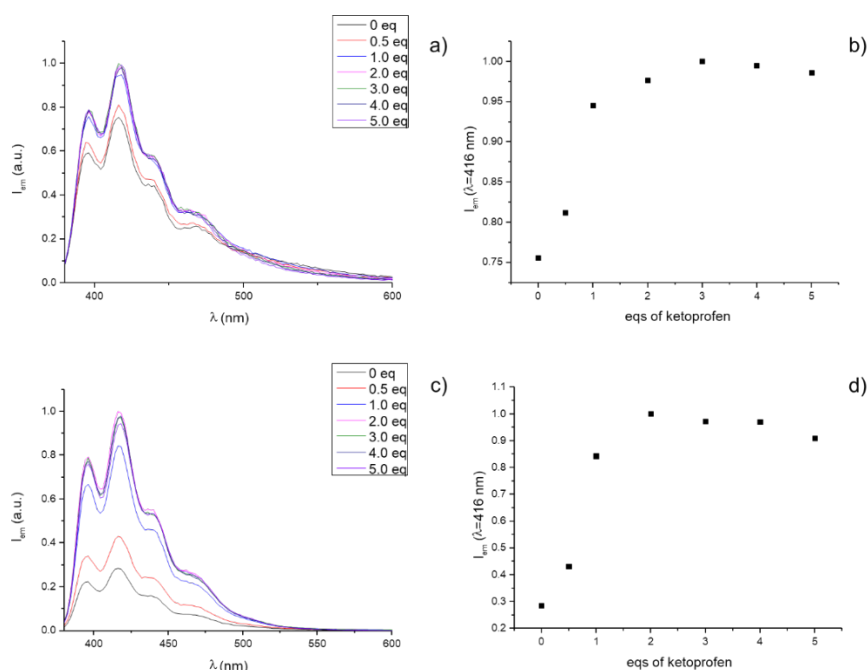

**Figure S26.** Emission spectra of **L1** (a) and **L2** (c) at pH 7 (0.001 M TRIS buffer) in  $H_2O$  in the presence of increasing amounts of ketoprofen at 298 K ( $[L1] = 10^{-5}$  M,  $[L2] = 10^{-5}$  M,  $\lambda_{exc} = 340$  nm) and plots of the fluorescence emission of **L1** (b) and **L2** (d) at 416 nm.

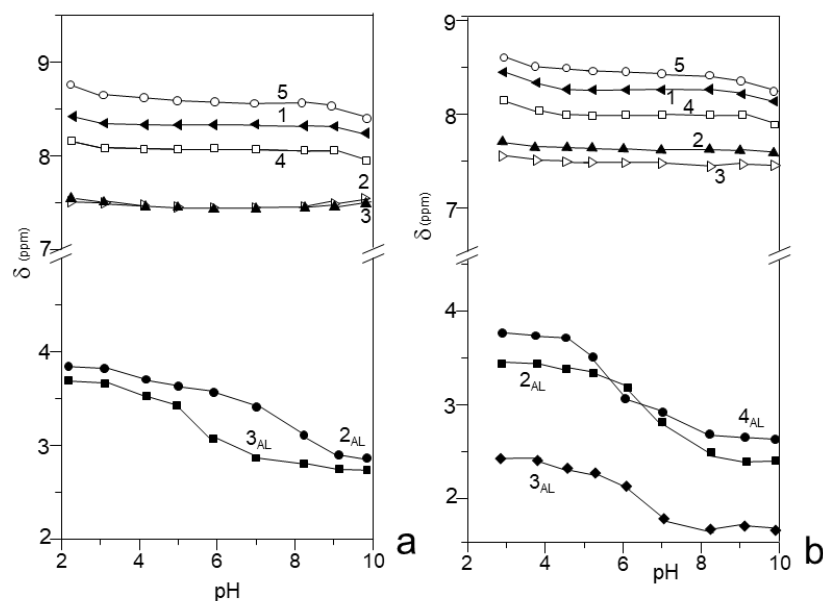

**Figure S27.** pH dependence of  $^1\text{H}$  NMR signals of **L1** (a) and **L2** (b) as a function of pH ( $\text{D}_2\text{O}/\text{C}_2\text{D}_5\text{OD}$  30:70 Vol: Vol, 298 K). The  $^1\text{H}$  NMR spectra of **L1** recorded at different pH values shows that protonation of **L1** to give  $[\text{HL1}]^+$  species, occurring below pH 8, induces a marked downfield shift of the signal of the  $\text{CH}_2$  group  $3_{\text{AL}}$ , adjacent to the central nitrogen and to a minor shift for methylene  $2_{\text{AL}}$ , suggesting that the first protonation step occurs on the central amine of the aliphatic chain. Further pH decrease below pH 6 and consequent formation of the  $[\text{H}_2\text{L1}]^{2+}$  species induces a remarkable downfield shift of the signal of the  $\text{CH}_2$   $2_{\text{AL}}$  and negligible shift for the  $\text{CH}_2$   $3_{\text{AL}}$ , indicating that in  $[\text{H}_2\text{L1}]^{2+}$  the two ammonium groups are localized on the two lateral benzylic amine groups, thus achieving a minimization of the repulsion between positive charges. Similarly, the pH dependence of the  $^1\text{H}$  NMR signals of the  $\text{CH}_2$  groups  $2_{\text{AL}}$  and  $4_{\text{AL}}$  of **L2** accounts for protonation of the central nitrogen in the  $[\text{HL2}]^+$  species and of both benzylic amines in  $[\text{H}_2\text{L2}]^+$ .

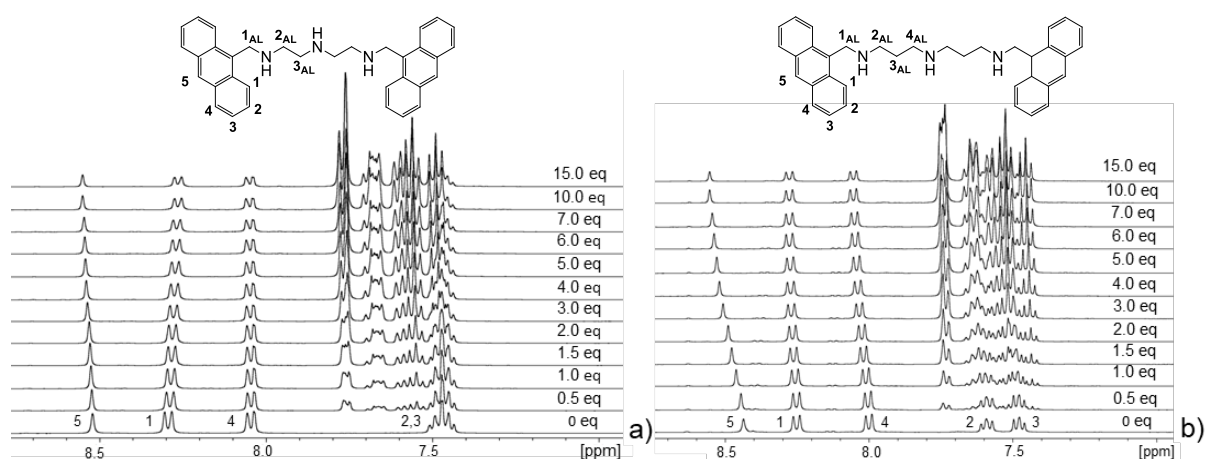

**Figure S28.** Aromatic signals of the  $^1\text{H}$  NMR spectra of **L1** (a) and **L2** (b) at pH 7  $\text{D}_2\text{O}/\text{CD}_3\text{OD}$  30:70 (Vol:Vol) in the presence of increasing amounts of ketoprofen at 298 K. a)  $J_{1,2} = 9$  Hz,  $J_{3,4} = 8$  Hz. b)  $J_{1,2} = 9$  Hz,  $J_{2,3} = 8$  Hz,  $J_{3,4} = 8$  Hz.

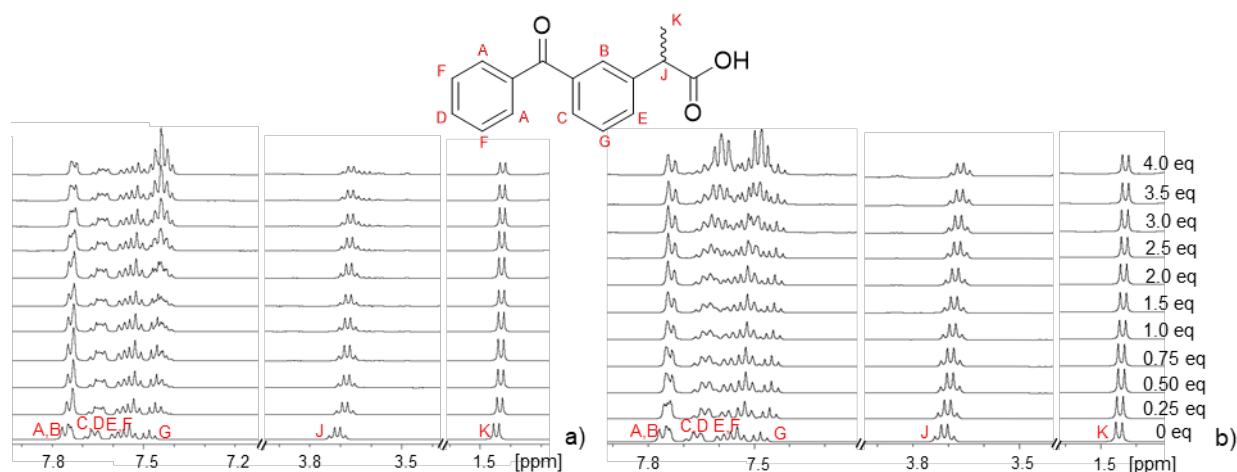

**Figure S29.**  $^1\text{H}$  NMR spectra of ketoprofen at pH 7  $\text{D}_2\text{O}/\text{CD}_3\text{OD}$  30:70 (Vol:Vol) in the presence of increasing amounts of **L1** (a) and **L2** (b) at 298 K.  $J_{J,K} = 7$  Hz; the coupling constants values of the aromatic signals cannot confidently be determined due to signal superimposition.

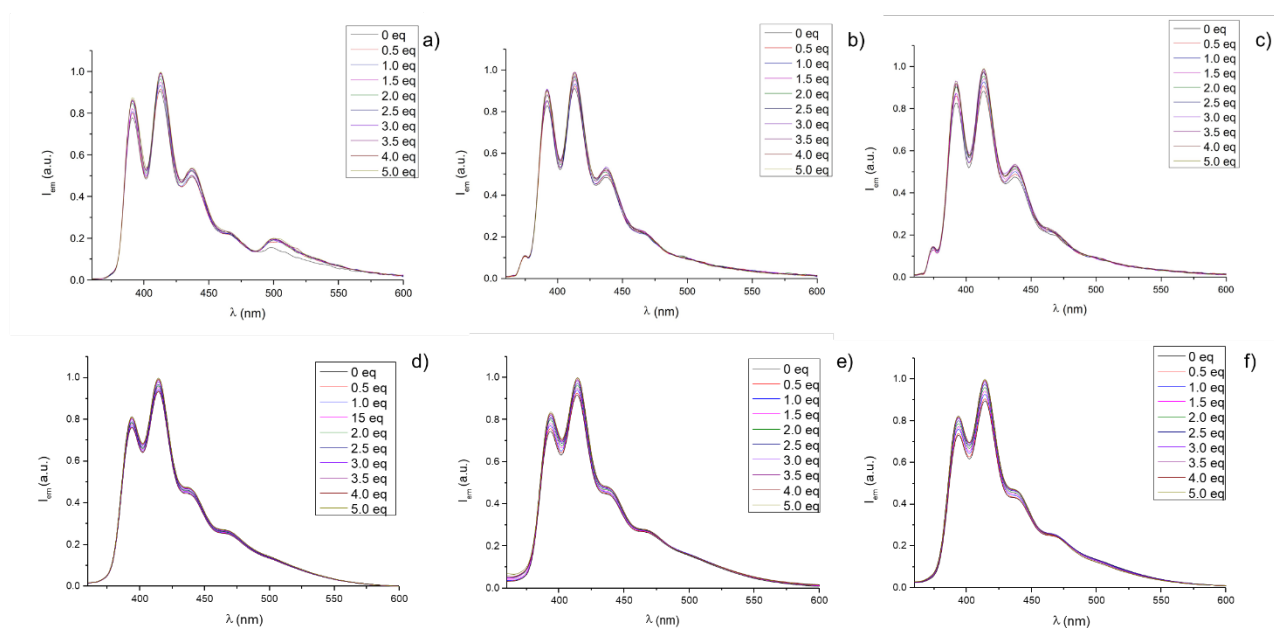

**Figure S30.** Emission spectra of **L1** and **L2** at pH 7 (0.001 M TRIS buffer, 298 K) in  $\text{H}_2\text{O}/\text{EtOH}$  50:50 (Vol:Vol) in the presence of increasing amounts of sodium acetate ((a) **L1** and (d) **L2**), benzoic acid ((b) **L1** and (e) **L2**) and ibuprofen sodium salt ((c) **L1** and (f) **L2**). ( $[\text{L1}] = 1 \cdot 10^{-5}$  M,  $[\text{L2}] = 1 \cdot 10^{-5}$  M  $\lambda_{\text{exc}} = 340$  nm).

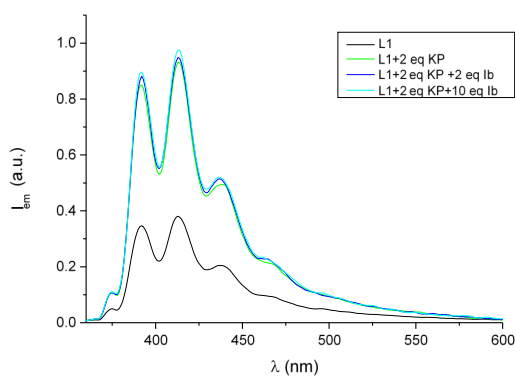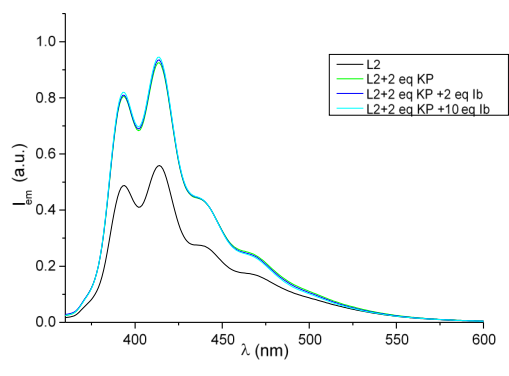

(a)

(b)

**Figure S31.** (a) Emission spectra of **L1** at pH 7 (0.001 M TRIS buffer, 298 K) in H<sub>2</sub>O/EtOH 50:50 (Vol/Vol) in the absence (black line) and in the presence of KP only (2 equivalents, green line) and KP (2 equivalents) + ibuprofen (2 equivalents, blue line or 10 equivalents, cyan line) ( $[L1] = 10^{-5}$  M,  $\lambda_{exc} = 340$  nm); emission spectra of **L2** at pH 7 (0.001 M TRIS buffer) in H<sub>2</sub>O/EtOH 50:50 (Vol/Vol) in the absence (black line) and in the presence of KP only (2 equivalents, green line) and KP (2 equivalents) + ibuprofen (2 equivalents, blue line or 10 equivalents, cyan line) ( $[L2] = 10^{-5}$  M,  $\lambda_{exc} = 340$  nm)

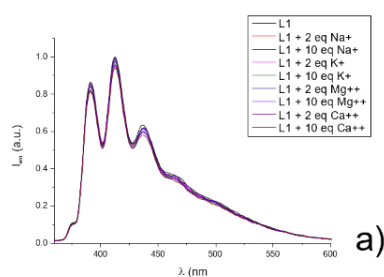

a)

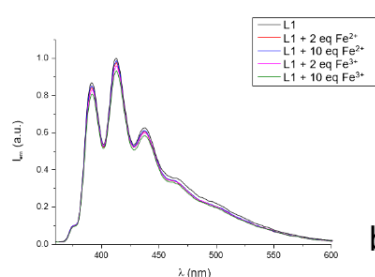

b)

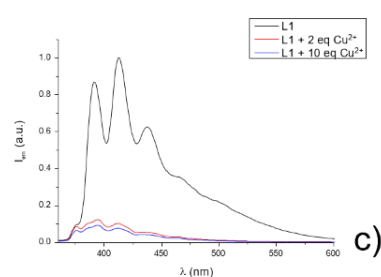

c)

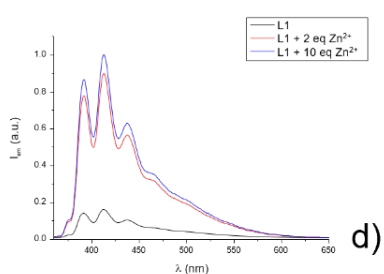

d)

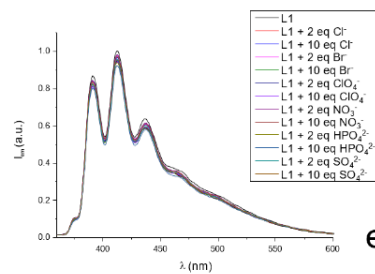

e)

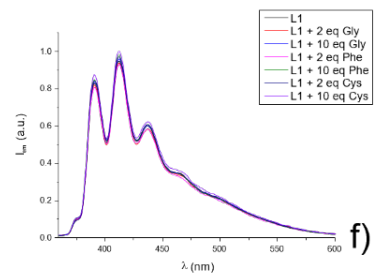

f)

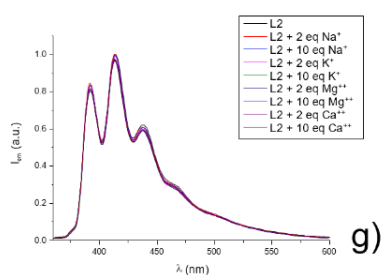

g)

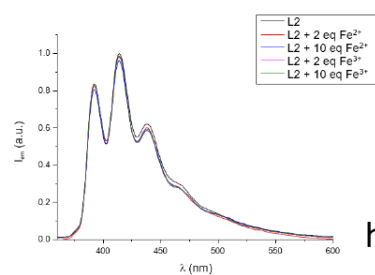

h)

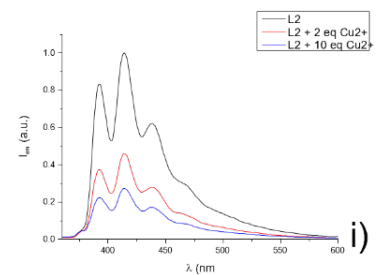

i)

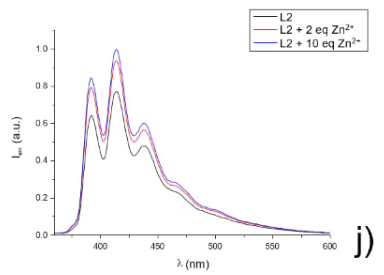

j)

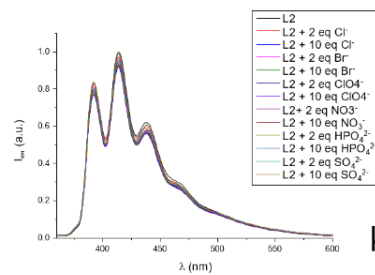

k)

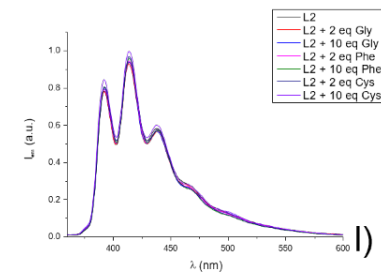

l)

**Figure S32.** Emission spectra of **L1** (a-f) and **L2** (g-l) at pH 7 (0.001 M TRIS buffer, 298 K) in H<sub>2</sub>O/EtOH 50:50 (Vol/Vol) in the absence and in the presence of 2 and 10 equivs. of different interfering agents. ([**L1**] = 10<sup>-5</sup> M, [**L2**] = 10<sup>-5</sup> M,  $\lambda_{\text{exc}}$  = 340 nm); a) **L1** + Na<sup>+</sup>, K<sup>+</sup>, Mg<sup>2+</sup> or Ca<sup>2+</sup>; b) **L1** + Fe<sup>2+</sup> or Fe<sup>3+</sup>; c) **L1** + Cu<sup>2+</sup>; d) **L1** + Zn<sup>2+</sup>; e) **L1** + Cl<sup>-</sup>, Br<sup>-</sup>, ClO<sub>4</sub><sup>-</sup>, NO<sub>3</sub><sup>-</sup>, HPO<sub>4</sub><sup>2-</sup> or SO<sub>4</sub><sup>2-</sup>; f) **L1** + Gly, Phe or Cys; g) **L2** + Na<sup>+</sup>, K<sup>+</sup>, Mg<sup>2+</sup> or Ca<sup>2+</sup>; h) **L2** + Fe<sup>2+</sup> or Fe<sup>3+</sup>; i) **L2** + Cu<sup>2+</sup>; j) **L2** + Zn<sup>2+</sup>; k) **L2** + Cl<sup>-</sup>, Br<sup>-</sup>, ClO<sub>4</sub><sup>-</sup>, NO<sub>3</sub><sup>-</sup>, HPO<sub>4</sub><sup>2-</sup> or SO<sub>4</sub><sup>2-</sup>; l) **L2** + Gly, Phe or Cys (pH 7, 0.001 M TRIS buffer, 298 K, H<sub>2</sub>O/EtOH 50:50 (Vol/Vol)). The pH of the buffer was generally adjusted at 7 by addition of NaOH to a solution of TRIS·HCl. In the test with Na<sup>+</sup> as interfering agent the TRIS buffer at pH 7 was prepared starting from a TRIS·HCl solution and adjusting the pH at 7 with NMe<sub>4</sub>OH, to avoid the presence of Na<sup>+</sup> in the tested solution; in the test with Cl<sup>-</sup> as interfering agent the TRIS buffer at pH 7 was prepared by using TRIS free base and adjusting the pH at 7 with CF<sub>3</sub>SO<sub>3</sub>H, to avoid the presence of Cl<sup>-</sup> in the tested solution.

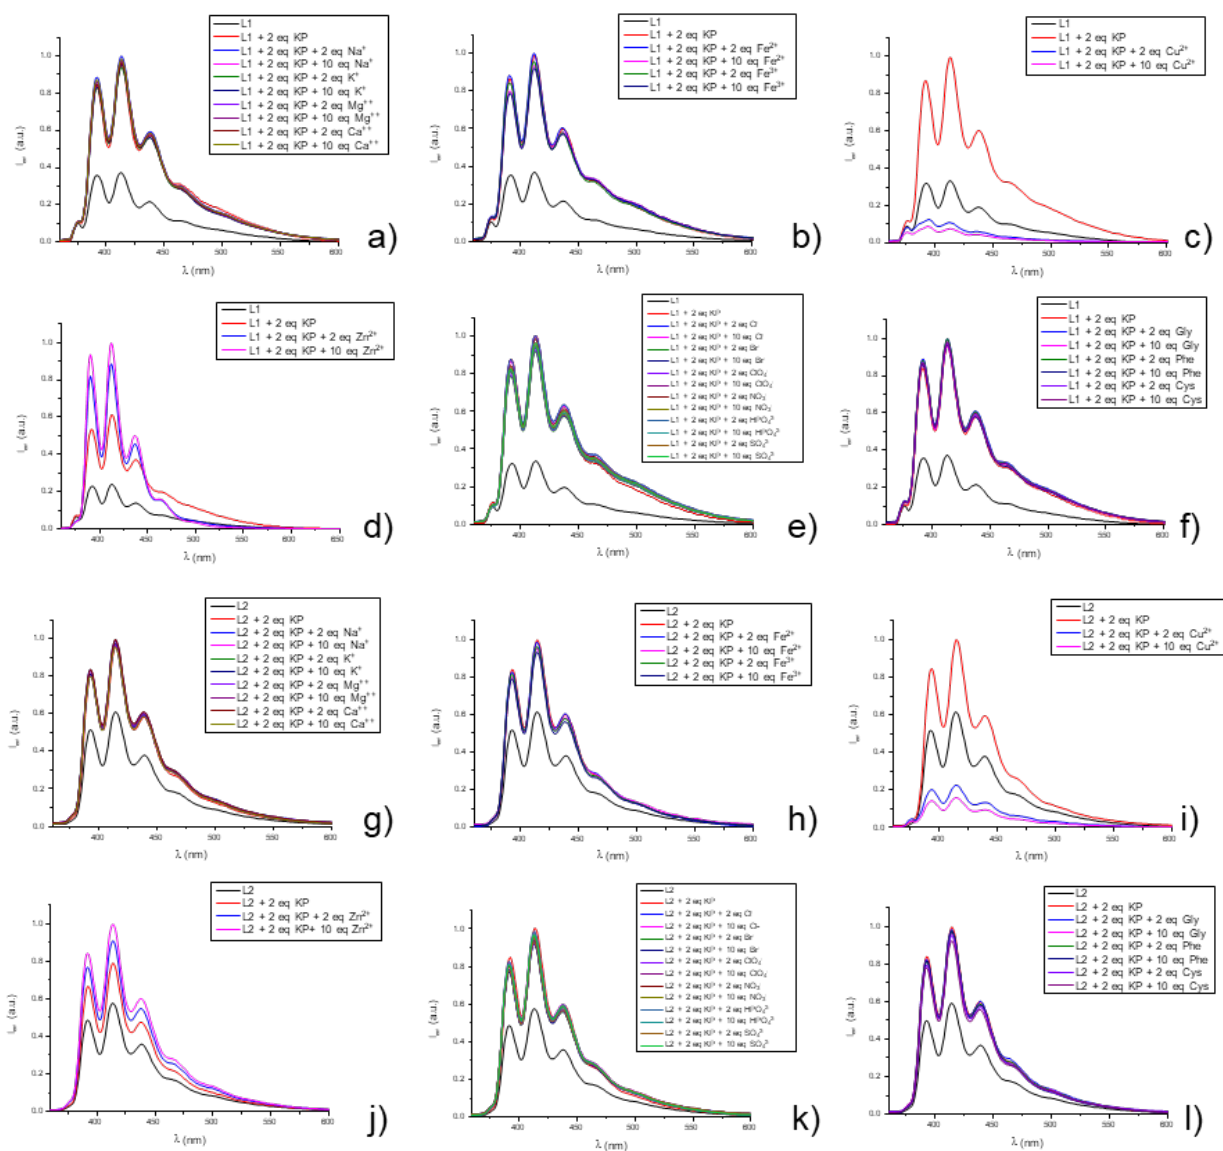

**Figure S33.** Emission spectra of **L1**, **L1** with 2 eqs. of KP and **L1** with 2 eqs. of KP in the presence of 2 and 10 eqs. of different interfering agents (a-f); emission spectra of **L2**, **L2** with 2 eqs. of KP and **L2** with 2 eqs. of KP in the presence of 2 and 10 eqs. of interfering agents. (pH 7, 0.001 M TRIS buffer, 298 K, in H<sub>2</sub>O/EtOH 50:50 (Vol:Vol), [L1] = 10<sup>-5</sup> M, [L2] = 10<sup>-5</sup> M, λ<sub>exc</sub> = 340 nm). a) **L1** + KP and Na<sup>+</sup>, K<sup>+</sup>, Mg<sup>2+</sup> or Ca<sup>2+</sup>; b) **L1** + KP and Fe<sup>2+</sup> or Fe<sup>3+</sup>; c) **L1** + KP and Cu<sup>2+</sup>; d) **L1** + KP and Zn<sup>2+</sup>; e) **L1** + KP and Cl<sup>-</sup>, Br<sup>-</sup>, ClO<sub>4</sub><sup>-</sup>, NO<sub>3</sub><sup>-</sup>, HPO<sub>4</sub><sup>2-</sup> or SO<sub>4</sub><sup>2-</sup>; f) **L1** + KP and Gly, Phe or Cys; g) **L2** + KP and Na<sup>+</sup>, K<sup>+</sup>, Mg<sup>2+</sup> or Ca<sup>2+</sup>; h) **L2** + KP and Fe<sup>2+</sup> or Fe<sup>3+</sup>; i) **L2** + KP and Cu<sup>2+</sup>; j) **L2** + KP and Zn<sup>2+</sup>; k) **L2** + KP and Cl<sup>-</sup>, Br<sup>-</sup>, ClO<sub>4</sub><sup>-</sup>, NO<sub>3</sub><sup>-</sup>, HPO<sub>4</sub><sup>2-</sup> or SO<sub>4</sub><sup>2-</sup>; l) **L2** + KP and Gly, Phe or Cys. (pH 7, 0.001 M TRIS buffer, 298 K, H<sub>2</sub>O/EtOH 50:50 (Vol:Vol)). The pH of the buffer was generally adjusted at 7 by addition of NaOH to a solution of TRIS·HCl. In the test with Na<sup>+</sup> as interfering agent the TRIS buffer at pH 7 was prepared starting from a TRIS·HCl solution and adjusting the pH at 7 with NMe<sub>4</sub>OH, to avoid the presence of Na<sup>+</sup> in the tested solution; in the test with Cl<sup>-</sup> as interfering agent the TRIS buffer at pH 7 was prepared by using TRIS free base and adjusting the pH at 7 with CF<sub>3</sub>SO<sub>3</sub>H, to avoid the presence of Cl<sup>-</sup> in the tested solution.

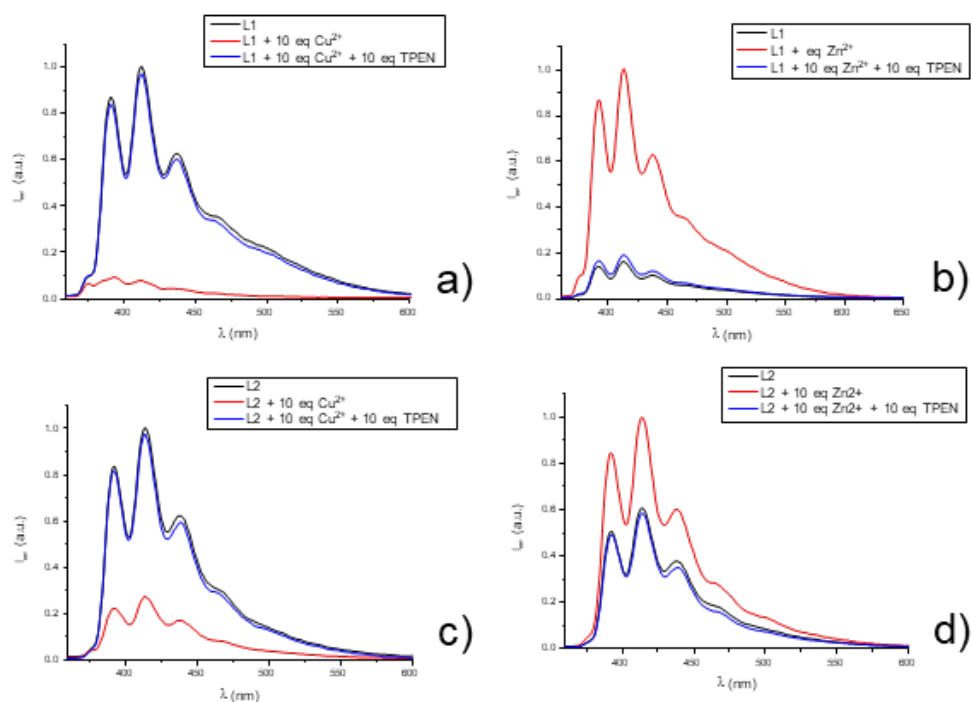

**Figure S34.** Effect of the addition of the metal chelator N,N,N',N'-tetrakis(2-pyridylmethyl)ethylenediamine (TPEN, 10 equivs) on solutions containing **L1** (a, b) and **L2** (c, d) and 10 equivs of  $\text{Cu}^{2+}$  and  $\text{Zn}^{2+}$ , displaying the restoral of original emission of both **L1** and **L2** upon addition of the metal sequestering agent TPEN (pH 7, 0.001 M TRIS buffer, 298 K,  $\text{H}_2\text{O}/\text{EtOH}$  50:50 (Vol/Vol));

a) emission spectra of **L1**, **L1** in the presence of  $\text{Cu}^{2+}$  and **L1** in the presence of  $\text{Cu}^{2+}$  after the addition of TPEN;

b) emission spectra of **L1**, **L1** in the presence of  $\text{Zn}^{2+}$  and **L1** in the presence of  $\text{Zn}^{2+}$  after the addition of TPEN;

c) emission spectra of **L2**, **L2** in the presence of  $\text{Cu}^{2+}$  and **L2** in the presence of  $\text{Cu}^{2+}$  after the addition of TPEN;

d) emission spectra of **L2**, **L2** in the presence of  $\text{Zn}^{2+}$  and **L2** in the presence of  $\text{Zn}^{2+}$  after the addition of TPEN.

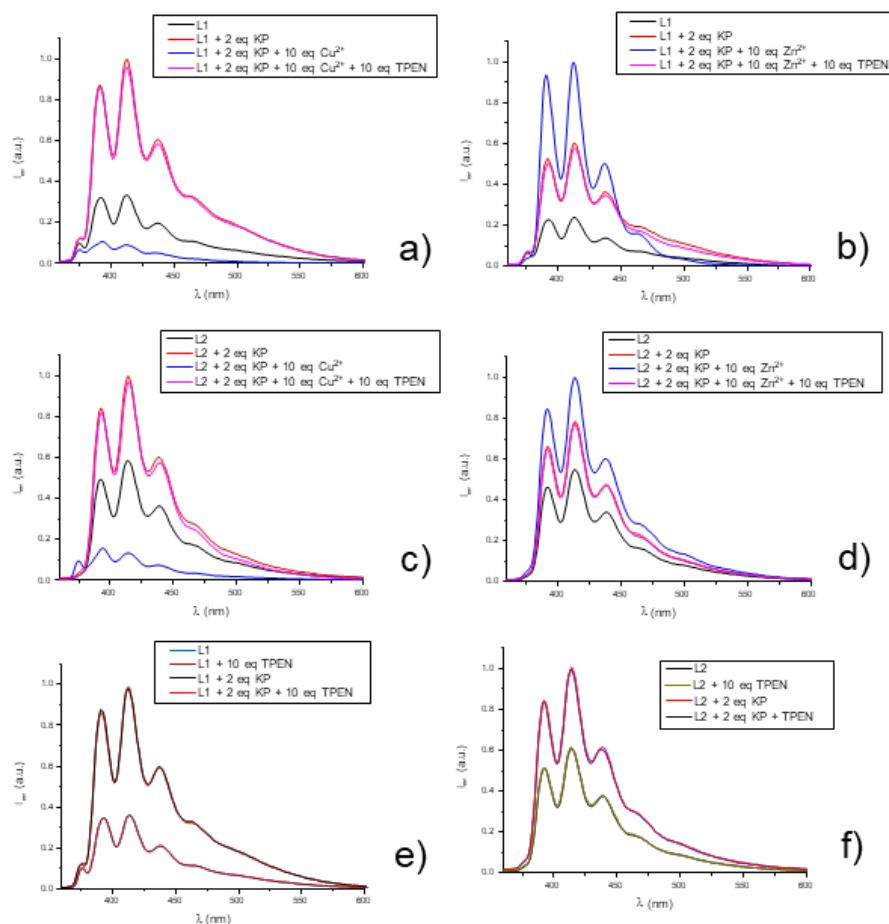

**Figure S35.** Effect of the addition of the metal chelator N,N,N',N'-tetrakis(2-pyridylmethyl)ethylenediamine (TPEN, 10 equivs) on solutions containing **L1** (a, b) and **L2** (c, d) in the presence of KP (2 equivs.) and added with 10 equivs of  $\text{Cu}^{2+}$  and  $\text{Zn}^{2+}$ , displaying the restoration of original emission of the KP complexes with **L1** and **L2** upon addition of the metal sequestering agent TPEN; the effect of the addition TPEN (10 equivs) to solutions containing **L1** or **L2** in the absence and in the absence of KP are also shown (e, f), to verify the absence of any interference of TPEN of the emission of **L1**, **L2** and their complexes (pH 7, 0.001 M TRIS buffer, 298 K,  $\text{H}_2\text{O}/\text{EtOH}$  50:50 (Vol/Vol));

a) emission spectra of **L1**, **L1** in the presence of KP, **L1** in the presence of KP and  $\text{Cu}^{2+}$  and **L1** in the presence of KP,  $\text{Cu}^{2+}$  and EDTA;

b) emission spectra of **L1**, **L1** in the presence of KP, **L1** in the presence of KP and  $\text{Zn}^{2+}$  and **L1** in the presence of KP,  $\text{Zn}^{2+}$  and TPEN;

c) emission spectra of **L2**, **L2** in the presence of KP, **L2** in the presence of KP and  $\text{Cu}^{2+}$  and **L2** in the presence of KP,  $\text{Cu}^{2+}$  and TPEN;

d) emission spectra of **L2**, **L2** in the presence of KP, **L2** in the presence of KP and  $\text{Zn}^{2+}$  and **L1** in the presence of KP,  $\text{Zn}^{2+}$  and TPEN;

e) emission spectra of **L1**, **L1** in the presence of KP, **L1** in the presence of KP and TPEN and **L1** in the presence of KP and TPEN;

f) emission spectra of **L2**, **L2** in the presence of KP, **L2** in the presence of KP and TPEN and **L2** in the presence of KP and TPEN;



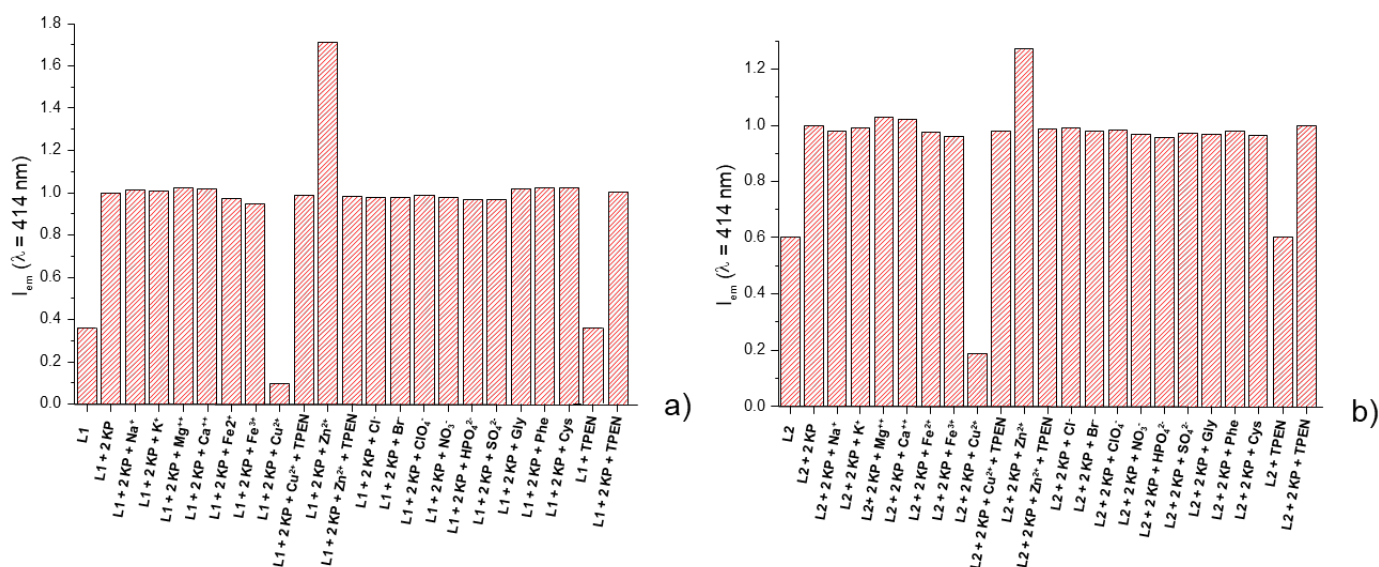

**Figure S36.** Emission intensity (a. u.) at 414 nm of **L1**, **L1** added with KP (2 equivs) and then treated with the different interfering agents tested (10 equivs.) (a) and of **L2**, **L2** added with KP (2 equivs) and then treated with the different interfering agents tested (10 equivs.) (b). The emission intensity at 414 nm of **L1** and **L2** added of 2 equivs of KP and 10 equivs of N,N,N',N'-tetrakis(2-pyridylmethyl)ethylenediamine (TPEN) are also reported. Addition of TPEN does not influence the emission of **L1**, **L2** and their complexes with KP (pH 7, 0.001 M TRIS buffer, 298 K, H<sub>2</sub>O/EtOH 50:50 (Vol/Vol)). All emission values have been referenced to those of **L1** (a) or **L2** in the presence of 2 equivs. of KP, whose values have been taken equal to 1.

**Table S3.** Crystallographic data and refinement parameters for compounds **1**.

|                                         |                                                                                                                                                |
|-----------------------------------------|------------------------------------------------------------------------------------------------------------------------------------------------|
|                                         | <b>1</b>                                                                                                                                       |
| Formula                                 | (C <sub>36</sub> H <sub>39</sub> N <sub>3</sub> )(C <sub>16</sub> H <sub>13</sub> O <sub>3</sub> ) <sub>2</sub> ·0.75EtOH·2.75H <sub>2</sub> O |
| M                                       | 1101.55                                                                                                                                        |
| T (K)                                   | 100                                                                                                                                            |
| $\lambda$ (Å)                           | 1.54184                                                                                                                                        |
| Crystal system, space group             | Triclinic, P-1                                                                                                                                 |
| Unit cell dimensions (Å, °)             | a = 12.1823(3); $\alpha$ = 101.400(1)<br>b = 13.0452(4); $\beta$ = 99.006(1)<br>c = 19.3857(5); $\gamma$ = 101.858(1)                          |
| V (Å <sup>3</sup> )                     | 2892.5(1)                                                                                                                                      |
| Z, $\rho$ (mg/cm <sup>3</sup> )         | 2, 1.269                                                                                                                                       |
| $\mu$ (mm <sup>-1</sup> )               | 0.666                                                                                                                                          |
| F(000)                                  | 1184                                                                                                                                           |
| Crystal size                            | 0.20 X 0.22 X 0.27                                                                                                                             |
| $\theta$ range (°)                      | 2.38 – 72.40                                                                                                                                   |
| Reflns collected / unique ( $R_{int}$ ) | 86439 / 11351 (0.0515)                                                                                                                         |
| Data / parameters                       | 11351 / 769                                                                                                                                    |
| Final R indices [ $I > 2\sigma$ ]       | R1 = 0.0631, wR2 = 0.1692                                                                                                                      |
| R indices (all data)                    | R1 = 0.0703, wR2 = 0.1763                                                                                                                      |
| GoF                                     | 1.012                                                                                                                                          |

**Table S4.** Selected torsion angles in **1**

| H <sub>2</sub> L2 <sup>2+</sup> | Dihedral angle (°) | KP anions                        | Dihedral angle (°) |
|---------------------------------|--------------------|----------------------------------|--------------------|
| C32-N1-C31-C17                  | 68.1(2)            | <i>S</i> -enantiomer             |                    |
| C31-N1-C32-C33                  | -170.9(1)          | $\tau_1$ = O1A-C10A-C8A-C9A      | 149.9(2)           |
| C35-N2-C34-C33                  | -176.1(2)          | $\tau_2$ = C2A-C3A-C7A-O3A       | 136.4(2)           |
| C34-N2-C35-C36                  | 179.7(2)           | $\tau_3$ = C12A-C11A-C7A-O3A     | -20.0(3)           |
| C38-N3-C37-C36                  | 173.6(2)           | C1A-C6A / C11A/C16A <sup>2</sup> | 59.99(7)           |
| C37-N3-C38-C39                  | 176.8(2)           | <i>R</i> -enantiomer             |                    |
| C17-C30 / C39-C52 <sup>1</sup>  | 58.11(4)           | $\tau_1$ = O1B-C10B-C8B-C9B      | 139.3(2)           |
|                                 |                    | $\tau_2$ = C2B-C3B-C7B-O3B       | -26.3(3)           |
|                                 |                    | $\tau_3$ = C12B-C11B-C7B-O3B     | -34.5(3)           |
|                                 |                    | C1B-C6B / C11B-C16B <sup>2</sup> | 56.34(8)           |

<sup>1</sup> = angle formed by the two mean planes defined by the carbon atoms of the two anthracene moieties

<sup>2</sup> = angle formed by the two mean planes defined by the carbon atoms of the two aromatic rings.

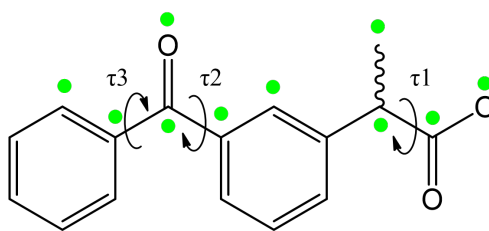

**Scheme S2.** Discussed torsion angles in KP anion.

**Table S5.** Torsion angles retrieved in the seven structures retrieved in the CSD.

| CSD refcode              | $\tau_1$ (°)                 | $\tau_2$ (°)                 | $\tau_3$ (°)                 |
|--------------------------|------------------------------|------------------------------|------------------------------|
| COZBAX <sup>1</sup>      | 96.3 / -83.4 / 175.6 / -69.3 | 16.4 / -34.2 / -18.7 / -21.6 | 42.1 / -28.8 / -47.5 / -32.5 |
| KEMRUP                   | -128.2                       | 21.7                         | 31.5                         |
| KEMRUP01 <sup>2</sup>    | -132.3 / 152.4               | 20.2 / 16.7                  | 31.5 / 38.7                  |
| MIRGAY <sup>3</sup>      | 139.6 / -81.6                | -22.7 / 22.1                 | -26.6 / 26.7                 |
| MIRGAY01 <sup>3</sup>    | 139.6 / -81.9                | -22.7 / 22.1                 | -26.7 / 26.8                 |
| MIRGAY02                 | 124.6 / -46.9                | 21.4 / -20.1                 | 32.5 / -31.4                 |
| CCDC2012545 <sup>4</sup> | -163.0 / -158.7              | -22.1 / -30.9                | -40.0 / -35.4                |

<sup>1</sup> = in the asymmetric unit of COZBAX four independent ketoprofen anion are present; <sup>2</sup> = in the asymmetric unit of KEMRUP01 two model for the disordered ketoprofen acid molecules are present; <sup>3</sup> = in the asymmetric unit of MIRGAY01 two independent ketoprofen acid molecules are present; <sup>4</sup> = in the asymmetric unit of CCDC2012545 two independent ketoprofen anion are present.

**Table S6.** Selected H-bond interactions in **1**.

| D-H...A                    | D...A (Å) | H...A (Å) | D-H...A (°) |
|----------------------------|-----------|-----------|-------------|
| N1-H1N1...O3B              | 2.949(2)  | 2.18(3)   | 141(2)      |
| N2-H1N2...O1A              | 2.664(2)  | 1.78(3)   | 158(3)      |
| N2-H2N2...O1B              | 2.669(2)  | 1.79(3)   | 162(3)      |
| N3-H2N3...O2A <sup>1</sup> | 2.716(2)  | 1.79(2)   | 169(2)      |
| N3-H1N3...O1B <sup>1</sup> | 2.785(2)  | 1.84(3)   | 167(2)      |

<sup>1</sup> = -x+1, -y+1, -z+1

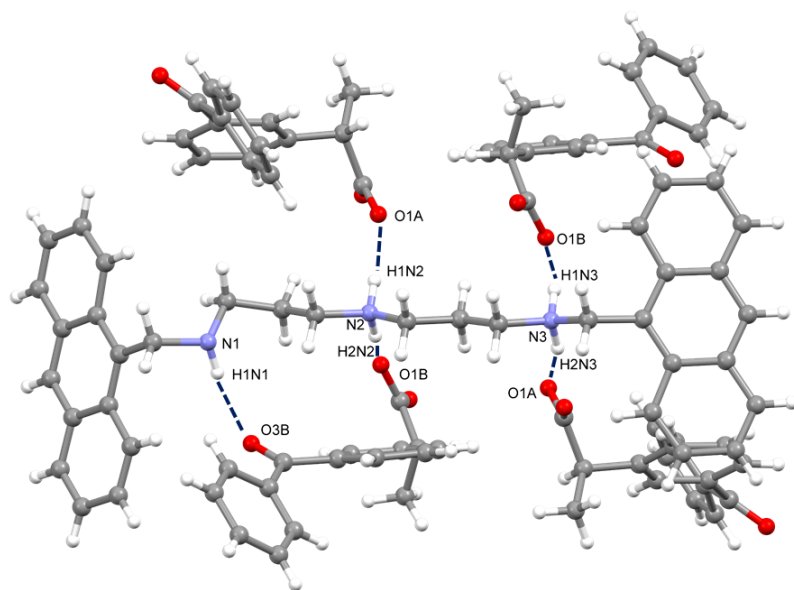

**Figure S37.** H-bonds scheme in **1**.

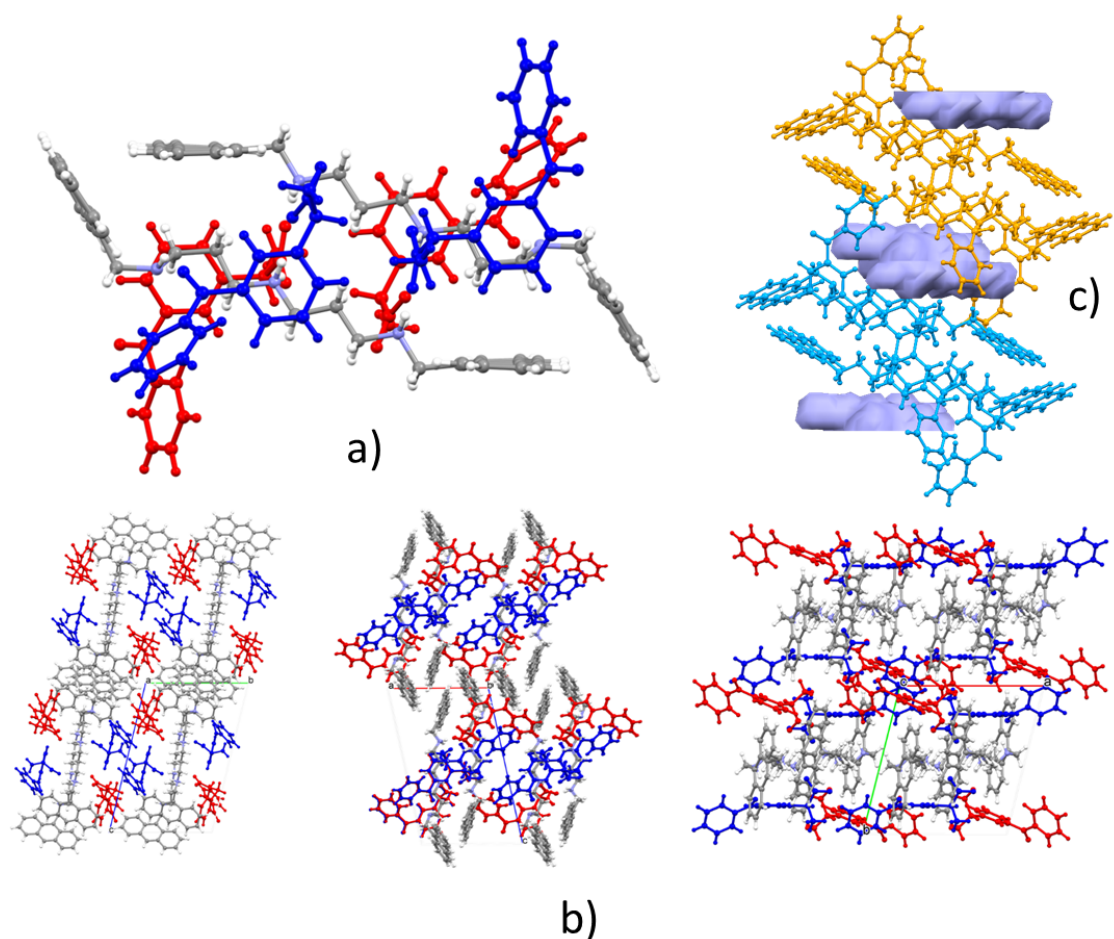

**Figure S38.** a) Disposition of KP anions in the 2:4 complex. R enantiomers, red, S enantiomers, blue. b) Disposition of the 2:4 complexes in the crystal packing of **1**, view along the a (left), b (middle) and c (right) axes. The colour scheme is the same of Figure S19 a). c) Spatial localization and volume (violet) occupied by solvent molecules ( $\text{H}_2\text{O}/\text{EtOH}$ ). Packing is seen along the b axes.

## REFERENCES

1. M. Savastano, C. Bazzicalupi, C. García-Gallarín, M. D. L. de la Torre, A. Bianchi and M. Melguizo, Supramolecular forces and their interplay in stabilizing complexes of organic anions: tuning binding selectivity in water, *Org. Chem. Front.*, 2018, **6**, 75–86.
2. Fontanelli, M.; Micheloni, M. *Proceedings of the I Spanish-Italian Congress on Thermodynamics of Metal Complexes*; Diputación de Castellón: Castellón, Spain, 1990; pp. 41–43.
3. M. Savastano, M. Fiaschi, G. Ferraro, P. Gratteri, P. Mariani, A. Bianchi and C. Bazzicalupi, *Sensing Zn<sup>2+</sup> in Aqueous Solution with a Fluorescent Scorpionate Macrocyclic Ligand Decorated with an Anthracene Bearing Tail*, *Molecules*, 2020, **25**, 1355.
4. G. Gran, Determination of the equivalence point in potentiometric titrations. Part II, *Analyst*, 1952, **77**, 661–671.
5. P. Gans, A. Sabatini and A. Vacca, Investigation of equilibria in solution. Determination of equilibrium constants with the HYPERQUAD suite of programs, *Talanta*, 1996, **43**, 1739–1753.
6. Mei, Q.; Shi, Y.; Hua Q.; Tong B. *RSC Adv.*, **2015**, *5*, 74924-74931.
7. Bruker (2012). Bruker APEX2. Bruker AXS Inc., Madison, Wisconsin, USA.
8. Bruker (2012). Bruker SAINT. Bruker AXS Inc., Madison, Wisconsin, USA.
9. Krause, L.; Herbst-Irmer, R.; Sheldrick G.M.; Stalke D. *J. Appl. Cryst.*, **2015**, *48*, 3-10.
10. Burla, M. C.; Caliendo, R.; Camalli, M.; Carrozzini, B.; Cascarano, G. L.; Da Caro, L.; Giacovazzo, C.; Polidori, G.; Spagna, R., *J. Appl. Crystallogr.*, **2005**, *38*, 381-388.
11. Sheldrick, G. M., *Acta Crystallogr., Sect. C: Struct. Chem.*, **2015**, *71*, 3-8.
12. M. Nardelli, *J. Appl. Crystallogr.* **1995**, *28*, 659.
13. C. F. Macrae, I. J. Bruno, J. A. Chisholm, P. R. Edgington, P. McCabe, E. Pidcock, E. Rodriguez-Monge, R. Taylor, J. van de Streek, P. A. Wood, *J. Appl. Crystallogr.* **2008**, *41*, 466-470.
14. Dassault Systèmes BIOVIA, Discovery Visualizer, v19.1.0.18287 (2019), San Diego: Dassault Systèmes.
15. P. Rossi, Paola Paoli, L. Chelazzi, S. Milazzo, D. Biagi, M. Valleri, A. Ienco, B. Valtancoli, L. Conti, *Cryst. Growth Des.* (2019), **20**, 226 (**COZBAX**)
16. P. Briard, J.C. Rossi, *Acta Crystallogr., Sect. C: Cryst. Struct. Commun.* (1990), **46**, 1036. (**KEMRUP**)
17. S. Pawledzio, A. Makal, D. Trzybinski, K. Wozniak, *IUCrJ* (2018), **5**, 841 (**KEMRUP01**, **MIRGAY** and **MIRGAY01**)
18. P. Rossi, P. Paoli, A. Ienco, D. Biagi, M. Valleri, L. Conti, *Acta Cryst C*, **2019**, *75*, 783-792 (**MIRGAY02**)
19. P. Rossi, P. Paoli, S. Milazzo, L. Chelazzi, M. P. Giovannoni, G. Guerrini, A. Ienco, M. Valleri, L. Conti, *Crystals*, **2020**, *10*, 659-673. (**CCDC2012545**)
20. C. R. Groom, I. J. Bruno, M. P. Lightfoot and S. C. Ward, *Acta Cryst.*, **2016**, *B72*, 171-179.
